# Supplementary material for: Proteome Mining of Sortase A Dependent Proteins (SDPs) in Lactic Acid Bacteria and Docking Analysis of SDPs Interaction with Sortase A
Source: Research Square preprint supplement (doi:10.21203/rs.3.rs-125367/v1), 2020-12-14
Supplement: Supplementary file 1 [file 08c77a30ba8d665c3750c1e9.xlsx]

## Sheet: Sheet1
Proteome ID	SDP’s UniProt ID	Known structure	LPXTG motif	Presence of Signal Peptide	Organism name	SDP’s name	Length(amino acids)	Motif position in SDPs
UP000000432	F9UM21_LACPL	NO	LPQTG	YES	Lactobacillus plantarum (strain ATCC BAA-793 / NCIMB 8826 / WCFS1)	Cell surface protein, LPXTG-motif cell wall anchor	2139	2102-2106
UP000000432	F9USM7_LACPL	NO	LPQTG	YES	Lactobacillus plantarum (strain ATCC BAA-793 / NCIMB 8826 / WCFS1)	Mucus-binding protein, LPXTG-motif cell wall anchor	2032	1995-2000
UP000000432	F9USA8_LACPL	NO	LPQTG	YES	Lactobacillus plantarum (strain ATCC BAA-793 / NCIMB 8826 / WCFS1)	Cell surface protein, CscD family,LPXTG-motif cell wall anchor	125	86-90
UP000000432	F9US24_LACPL	NO	LPQTG	YES	Lactobacillus plantarum (strain ATCC BAA-793 / NCIMB 8826 / WCFS1)	Cell surface protein, LPXTG-motif cell wall anchor	419	381-385
UP000000432	F9USD0_LACPL	NO	LPQTG	YES	Lactobacillus plantarum (strain ATCC BAA-793 / NCIMB 8826 / WCFS1)	Cell surface protein, LPXTG-motif cell wall anchor	1074	1040-1044
UP000000432	F9URR1_LACPL	NO	LPQTG	YES	Lactobacillus plantarum (strain ATCC BAA-793 / NCIMB 8826 / WCFS1)	Cell surface protein, LPXTG-motif cell wall anchor	1039	1004-1008
UP000003176	C2D5H2_LACBR	NO	LPQTG	YES	Lactobacillus brevis subsp. gravesensis ATCC 27305	Uncharacterized protein	598	567-571
UP000003176	C2D2J2_LACBR	NO	LPQTG	YES	Lactobacillus brevis subsp. gravesensis ATCC 27306	LPXTG-motif cell wall anchor domain protein	2808	2775-2779
UP000001651	Q1HS39_LACP3	NO	LPETG	YES	Lactobacillus paracasei (strain ATCC 334 / BCRC 17002 / CIP 107868 / KCTC 3260 / NRRL B-441)	Uncharacterized protein	531	495-499
UP000001651	Q035L7_LACP3	NO	LPMTG	YES	Lactobacillus paracasei (strain ATCC 334 / BCRC 17002 / CIP 107868 / KCTC 3260 / NRRL B-441)	Uncharacterized protein	519	486-490
UP000001651	Q035Q8_LACP3	NO	LPNTG	YES	Lactobacillus paracasei (strain ATCC 334 / BCRC 17002 / CIP 107868 / KCTC 3260 / NRRL B-441)	Uncharacterized protein	423	388-392
UP000051071	A0A0R1PDX3_9LACO	NO	LPTTG	YES	Lactobacillus kefiranofaciens subsp. kefirgranum DSM 10550 = JCM 8572	Uncharacterized protein	382	268-212
UP000051291	A0A0R1Z9T7_9LACO	NO	LPATG	YES	Lactobacillus aviarius subsp. araffinosus DSM 20653	Uncharacterized protein	521	488-492
UP000051291	A0A0R1ZI96_9LACO	NO	LPQTG	YES	Lactobacillus aviarius subsp. araffinosus DSM 20653	Outer membrane protein	583	552-556
UP000002707	Q38UI8_LACSS	NO	LPQTG	YES	Lactobacillus sakei subsp. sakei (strain 23K)	Hypothetical cell surface protein (With LPQTG sorting signal)	486	454-458
UP000002707	Q38W47_LACSS	NO	LPQTG	YES	Lactobacillus sakei subsp. sakei (strain 23K)	Hypothetical cell surface protein (With LPQTG sorting signal)	131	91-95
UP000006381	Q5FIL0_LACAC	NO	LPATG	YES	Lactobacillus acidophilus (strain ATCC 700396 / NCK56 / N2 / NCFM)	Mucus binding protein; Mub	1174	1126-1130
UP000006381	Q5FIK8_LACAC	NO	LPETG	YES	Lactobacillus acidophilus (strain ATCC 700396 / NCK56 / N2 / NCFM)	Putative surface protein	685	640-644
UP000006381	Q5FIM7_LACAC	NO	LPQTG	YES	Lactobacillus acidophilus (strain ATCC 700396 / NCK56 / N2 / NCFM)	Surface protein	1924	1888-1892
UP000006381	Q5FJA7_LACAC	NO	LPQTG	YES	Lactobacillus acidophilus (strain ATCC 700396 / NCK56 / N2 / NCFM)	Mucus binding protein Mub	4326	4287-4291
UP000006381	Q5FLL3_LACAC	NO	LPTTG	YES	Lactobacillus acidophilus (strain ATCC 700396 / NCK56 / N2 / NCFM)	Uncharacterized protein	382	268-272
UP000004483	C2EUF0_9LACO	NO	LPQTG	YES	Lactobacillus vaginalis DSM 5837 = ATCC 49540	LPXTG-motif cell wall anchor domain protein	164	129-133
UP000051789	A0A0R2C3W3_9LACO	NO	LPDTG	YES	Lactobacillus thailandensis DSM 22698 = JCM 13996	Uncharacterized protein	1013	975-979
UP000051789	A0A0R2CET4_9LACO	NO	LPQTG	YES	Lactobacillus thailandensis DSM 22698 = JCM 13996	Uncharacterized protein	273	186-190
UP000051789	A0A0R2CET4_9LACO	NO	LPQTG	YES	Lactobacillus thailandensis DSM 22698 = JCM 13996	Uncharacterized protein	273	204-208
UP000052013	A0A0R1SHQ2_9LACO	NO	LPQTG	YES	Lactobacillus diolivorans DSM 14421	Uncharacterized protein	648	616-619
UP000052013	A0A0R1SNB3_9LACO	NO	LPQTG	YES	Lactobacillus diolivorans DSM 14421	Fibro-slime domain protein	1166	1132-1136
UP000004115	C8PC75_9LACO	NO	LPQTG	YES	Lactobacillus iners DSM 13335	Gram-positive signal peptide protein, YSIRK family	3793	3760-3765
UP000019474	W9EL45_9LACO	NO	LPATG	YES	Lactobacillus florum 8D	Sucrose-6-phosphate hydrolase	791	750-755
UP000019474	W9EDR0_9LACO	NO	LPQTG	YES	Lactobacillus florum 8D	Peptidoglycan lytic protein P45	519	487-492
UP000019474	W9EFZ1_9LACO	NO	LPQTG	YES	Lactobacillus florum 8D	Cell surface protein, GY family	603	571-575
UP000019474	W9EM32_9LACO	NO	LPQTG	YES	Lactobacillus florum 8D	Uncharacterized protein	523	491-495
UP000051790	A0A0R1QT30_9LACO	NO	LPATG	YES	Lactobacillus manihotivorans DSM 13343 = JCM 12514	Uncharacterized protein	187	156-160
UP000051790	A0A0R1QGG2_9LACO	NO	LPDTG	YES	Lactobacillus manihotivorans DSM 13343 = JCM 12514	Cell wall surface anchor family protein	666	628-632
UP000051790	A0A0R1QIP6_9LACO	NO	LPHTG	YES	Lactobacillus manihotivorans DSM 13343 = JCM 12514	Fimbriae subunit	344	311-315
UP000051790	A0A0R1Q3L0_9LACO	NO	LPITG	YES	Lactobacillus manihotivorans DSM 13343 = JCM 12514	Uncharacterized protein	559	529-533
UP000051790	A0A0R1QS14_9LACO	NO	LPNTG	YES	Lactobacillus manihotivorans DSM 13343 = JCM 12514	Cell wall surface anchor family protein	683	647-651
UP000051790	A0A0R1RFN5_9LACO	NO	LPQTG	YES	Lactobacillus manihotivorans DSM 13343 = JCM 12514	Uncharacterized protein	146	110-1144
UP000051790	A0A0R1QHF1_9LACO	NO	LPSTG	YES	Lactobacillus manihotivorans DSM 13343 = JCM 12514	Uncharacterized protein	762	622-626
UP000051790	A0A0R1Q3H5_9LACO	NO	LPVTG	YES	Lactobacillus manihotivorans DSM 13343 = JCM 12514	Pilus specific adhesion protein	1022	987-991
UP000051160	A0A0R1LSC6_9LACO	NO	LPQTG	YES	Lactobacillus odoratitofui DSM 19909 = JCM 15043	Uncharacterized protein	2935	2900-2904
UP000028700	A0A081BKW3_9LACO	NO	LPATG	YES	Lactobacillus oryzae JCM 18671	Pilus protein	868	832-836
UP000028700	A0A081BKY4_9LACO	NO	LPQTG	YES	Lactobacillus oryzae JCM 18671	Uncharacterized protein	77	67-71
UP000028700	A0A081BKW2_9LACO	NO	LPQTG	YES	Lactobacillus oryzae JCM 18671	LPXTG-motif cell wall anchor domain protein	425	387-391
UP000028700	A0A081BKW1_9LACO	NO	LPSTG	YES	Lactobacillus oryzae JCM 18671	Cell wall surface anchor protein	507	472-476
UP000051131	A0A0R2CHI1_9LACO	NO	LPQTG	YES	Lactobacillus cacaonum DSM 21116	Uncharacterized protein	591	555-559
UP000051131	A0A0R2CZS5_9LACO	NO	LPQTG	YES	Lactobacillus cacaonum DSM 21116	Mucus-binding protein	670	631-635
UP000051131	A0A0R2CF79_9LACO	NO	LPQTG	YES	Lactobacillus cacaonum DSM 21116	Uncharacterized protein	537	503-507
UP000051999	A0A0R1RK95_9LACO	NO	LPDTG	YES	Lactobacillus rossiae DSM 15814	Uncharacterized protein	3320	3274-3278
UP000051999	A0A0R1RL84_9LACO	NO	LPETG	YES	Lactobacillus rossiae DSM 15815	Uncharacterized protein	2686	2652-2656
UP000051999	A0A0R1RJN9_9LACO	NO	LPHTG	YES	Lactobacillus rossiae DSM 15814	Uncharacterized protein	2722	2683-2687
UP000051999	A0A0R1RS20_9LACO	NO	LPHTG	YES	Lactobacillus rossiae DSM 15815	Uncharacterized protein	1409	1376-1380
UP000051999	A0A0R1R857_9LACO	NO	LPNTG	YES	Lactobacillus rossiae DSM 15814	Uncharacterized protein	866	832-836
UP000051999	A0A0R1RFZ5_9LACO	NO	LPNTG	YES	Lactobacillus rossiae DSM 15814	Uncharacterized protein	2857	2821-2825
UP000051999	A0A0R1RE19_9LACO	NO	LPRTG	YES	Lactobacillus rossiae DSM 15814	Uncharacterized protein	766	725-729
UP000000581	Q74KU3_LACJO	NO	LPQTG	YES	Lactobacillus johnsonii (strain CNCM I-12250 / La1 / NCC 533)	Uncharacterized protein	4037	4001-4005
UP000000581	Q74JH9_LACJO	NO	LPQTG	YES	Lactobacillus johnsonii (strain CNCM I-12250 / La1 / NCC 533)	Uncharacterized protein	4734	4696-4700
UP000000581	Q74LY6_LACJO	NO	LPQTG	YES	Lactobacillus johnsonii (strain CNCM I-12250 / La1 / NCC 533)	Uncharacterized protein	2139	2102-2106
UP000000581	Q74LP0_LACJO	NO	LPQTG	YES	Lactobacillus johnsonii (strain CNCM I-12250 / La1 / NCC 533)	Uncharacterized protein	982	946-950
UP000000581	Q74HU0_LACJO	NO	LPQTG	YES	Lactobacillus johnsonii (strain CNCM I-12250 / La1 / NCC 533)	Uncharacterized protein	2789	2753-2757
UP000000581	Q74KY7_LACJO	NO	LPQTG	YES	Lactobacillus johnsonii (strain CNCM I-12250 / La1 / NCC 533)	Uncharacterized protein	1000	963-967
UP000006910	D8IGP9_LACFC	NO	LPQTG	YES	Lactobacillus fermentum (strain CECT 5716)	Uncharacterized protein	742	705-709
UP000006910	D8IHY8_LACFC	NO	LPQTG	YES	Lactobacillus fermentum (strain CECT 5716)	Uncharacterized protein	320	286-290
UP000019247	W6T723_9LACO	NO	LPATG	YES	Lactobacillus fabifermentans T30PCM01	Uncharacterized protein	1011	977-981
UP000019247	W6T469_9LACO	NO	LPQTG	YES	Lactobacillus fabifermentans T30PCM01	Cell surface protein	1135	1102-1106
UP000051412	A0A0R1XJK5_9LACO	NO	LPQTG	YES	Lactobacillus panis DSM 6035	Uncharacterized protein	1057	1025-1029
UP000051412	A0A0R1XRJ8_9LACO	NO	LPQTG	YES	Lactobacillus panis DSM 6036	Uncharacterized protein	1095	1065-1069
UP000051412	A0A0R1XHU7_9LACO	NO	LPQTG	YES	Lactobacillus panis DSM 6035	Uncharacterized protein	834	798-802
UP000051013	A0A0R2BSF7_9LACO	NO	LPQTG	YES	Lactobacillus coleohominis DSM 14060	LPXTG-domain-containing protein cell wall anchor domain-containing protein	799	765-769
UP000051085	A0A0R1XZ34_9LACO	NO	LPQTG	YES	Lactobacillus pontis DSM 8475	Uncharacterized protein	760	727-731
UP000051085	A0A0R1Y5K9_9LACO	NO	LPQTG	YES	Lactobacillus pontis DSM 8475	Uncharacterized protein	773	738-742
UP000011912	M5J4V0_9LACO	NO	LPHTG	YES	Lactobacillus saerimneri 30a	Transposon related peptidoglycan linked protein (LPXTG motif)	1101	1065-1069
UP000011912	M5J4F7_9LACO	NO	LPQTG	YES	Lactobacillus saerimneri 30a	Putative mucus binding protein	1345	1306-1310
UP000011912	M5J5K8_9LACO	NO	LPQTG	YES	Lactobacillus saerimneri 30a	Collagen-binding MSCRAMM Acm (Fms8)	629	596-600
UP000011912	M5J5X1_9LACO	NO	LPQTG	YES	Lactobacillus saerimneri 30a	Transposon related peptidoglycan linked protein (LPXTG motif)	1047	1012-1016
UP000030647	U4TT12_9LACO	NO	LPFTG	YES	Lactobacillus shenzhenensis LY-74	Uncharacterized protein	798	761-765
UP000030647	U4TIH4_9LACO	NO	LPFTG	YES	Lactobacillus shenzhenensis LY-76	Uncharacterized protein	2242	2185-2189
UP000030647	U4TIU2_9LACO	NO	LPQTG	YES	Lactobacillus shenzhenensis LY-73	Uncharacterized protein	1329	1294-1298
UP000030647	U4TU77_9LACO	NO	LPQTG	YES	Lactobacillus shenzhenensis LY-74	Uncharacterized protein	1107	1069-1073
UP000030647	U4TRL8_9LACO	NO	LPQTG	YES	Lactobacillus shenzhenensis LY-74	Uncharacterized protein	456	421-425
UP000051445	A0A0R1P7R0_9LACO	NO	LPQTG	YES	Lactobacillus frumenti DSM 13145	LPXTG-motif cell wall anchor domain protein	798	766-770
UP000051445	A0A0R1PFI0_9LACO	NO	LPQTG	YES	Lactobacillus frumenti DSM 13145	Uncharacterized protein	753	722-726
UP000051256	A0A0R2CT48_9LACO	NO	LPITG	YES	Lactobacillus senioris DSM 24302 = JCM 17473	Uncharacterized protein	500	467-471
UP000051256	A0A0R2CQW4_9LACO	NO	LPVTG	YES	Lactobacillus senioris DSM 24302 = JCM 17472	Uncharacterized protein	972	939-943
UP000051162	A0A0R1K6E4_9LACO	NO	LPQTG	YES	Lactobacillus namurensis DSM 19117	Uncharacterized protein	429	396-400
UP000001652	Q03SI2_LACBA	NO	LPKTG	YES	Lactobacillus brevis (strain ATCC 367 / JCM 1170)	Cell surface protein	396	362-366
UP000001652	Q03TD9_LACBA	NO	LPQTG	YES	Lactobacillus brevis (strain ATCC 367 / JCM 1170)	Uncharacterized protein	695	661-665
UP000001652	Q03R86_LACBA	NO	LPQTG	YES	Lactobacillus brevis (strain ATCC 367 / JCM 1170)	Predicted outer membrane protein	619	581-585
UP000001652	Q03N81_LACBA	NO	LPQTG	YES	Lactobacillus brevis (strain ATCC 367 / JCM 1170)	Uncharacterized protein	400	368-372
UP000001652	Q03U29_LACBA	NO	LPQTG	YES	Lactobacillus brevis (strain ATCC 367 / JCM 1170)	Uncharacterized protein	912	880-885
UP000003070	E3C5T8_9LACO	NO	LPATG	YES	Lactobacillus oris PB013-T2-3	Gram-positive signal peptide protein, YSIRK family	653	615-619
UP000003070	E3C8V9_9LACO	NO	LPQTG	YES	Lactobacillus oris PB013-T2-3	LPXTG-motif cell wall anchor domain protein	2843	2807-2811
UP000003070	E3C782_9LACO	NO	LPQTG	YES	Lactobacillus oris PB013-T2-3	Gram-positive signal peptide protein, YSIRK family	629	595-600
UP000003070	E3C756_9LACO	NO	LPQTG	YES	Lactobacillus oris PB013-T2-4	Gram-positive signal peptide protein, YSIRK family	1652	1620-1624
UP000003070	E3C7R4_9LACO	NO	LPQTG	YES	Lactobacillus oris PB013-T2-5	LPXTG-motif cell wall anchor domain protein	947	914-918
UP000003070	E3C9F8_9LACO	NO	LPQTG	YES	Lactobacillus oris PB013-T2-5	KxYKxGKxW signal domain protein	546	511-515
UP000003070	E3C8E7_9LACO	NO	LPQTG	YES	Lactobacillus oris PB013-T2-5	LPXTG-motif cell wall anchor domain protein	715	683-687
UP000003070	E3C5G7_9LACO	NO	LPQTG	YES	Lactobacillus oris PB013-T2-6	KxYKxGKxW signal domain protein	822	789-793
UP000003070	E3C6F9_9LACO	NO	LPQTG	YES	Lactobacillus oris PB013-T2-7	KxYKxGKxW signal domain protein	522	490-494
UP000003070	E3C6I4_9LACO	NO	LPQTG	YES	Lactobacillus oris PB013-T2-8	LPXTG-motif cell wall anchor domain protein	1328	1296-1300
UP000003070	E3C8Y6_9LACO	NO	LPQTG	YES	Lactobacillus oris PB013-T2-9	LPXTG-motif cell wall anchor domain protein	956	923-927
UP000003070	E3C8I5_9LACO	NO	LPQTG	YES	Lactobacillus oris PB013-T2-9	LPXTG-motif cell wall anchor domain protein	255	220-224
UP000003070	E3C8D6_9LACO	NO	LPQTG	YES	Lactobacillus oris PB013-T2-10	LPXTG-motif cell wall anchor domain protein	394	356-360
UP000003070	E3C758_9LACO	NO	LPQTG	YES	Lactobacillus oris PB013-T2-10	LPXTG-motif cell wall anchor domain protein	540	503-507
UP000003070	E3C6G5_9LACO	NO	LPQTG	YES	Lactobacillus oris PB013-T2-10	Amidase	642	608-612
UP000051813	A0A0R2BKE5_9LACO	NO	LPQTG	YES	Lactobacillus dextrinicus DSM 20335	Gram_pos_anchor domain-containing protein	142	104-108
UP000051813	A0A0R2BH29_9LACO	NO	LPQTG	YES	Lactobacillus dextrinicus DSM 20336	Cell wall-associated surface protein	725	688-692
UP000051931	A0A0R1S7U0_9LACO	NO	LPQTG	YES	Lactobacillus psittaci DSM 15354	Levansucrase	765	732-736
UP000051931	A0A0R1SA05_9LACO	NO	LPQTG	YES	Lactobacillus psittaci DSM 15355	Uncharacterized protein	706	673-677
UP000051931	A0A0R1S2A5_9LACO	NO	LPQTG	YES	Lactobacillus psittaci DSM 15355	Uncharacterized protein	414	386-390
UP000051931	A0A0R1S4Q1_9LACO	NO	LPQTG	YES	Lactobacillus psittaci DSM 15354	Uncharacterized protein	1298	1267-1271
UP000051931	A0A0R1S2M3_9LACO	NO	LPQTG	YES	Lactobacillus psittaci DSM 15355	Uncharacterized protein	714	685-689
UP000051931	A0A0R1S0U0_9LACO	NO	LPQTG	YES	Lactobacillus psittaci DSM 15356	Uncharacterized protein	847	818-822
UP000051931	A0A0R1S4M8_9LACO	NO	LPQTG	YES	Lactobacillus psittaci DSM 15357	Uncharacterized protein	2816	2781-2785
UP000050929	A0A0R1IWK8_9LACO	NO	LPQTG	YES	Lactobacillus tucceti DSM 20183	Adhesion exoprotein	699	669-673
UP000003987	C7XWZ0_9LACO	NO	LPQTG	YES	Lactobacillus coleohominis 101-4-CHN	Gram-positive signal peptide protein, YSIRK family	580	547-551
UP000003987	C7XWS9_9LACO	NO	LPQTG	YES	Lactobacillus coleohominis 101-4-CHN	KxYKxGKxW signal domain protein	670	639-643
UP000003987	C7XXN8_9LACO	NO	LPQTG	YES	Lactobacillus coleohominis 101-4-CHN	LPXTG-motif cell wall anchor domain protein	496	463-467
UP000003987	C7XUD1_9LACO	NO	LPQTG	YES	Lactobacillus coleohominis 101-4-CHN	LPXTG-motif cell wall anchor domain protein	1190	1158-1162
UP000003987	C7XW19_9LACO	NO	LPQTG	YES	Lactobacillus coleohominis 101-4-CHN	Gram-positive signal peptide protein, YSIRK family	1604	1571-1575
UP000003987	C7XX21_9LACO	NO	LPQTG	YES	Lactobacillus coleohominis 101-4-CHN	KxYKxGKxW signal domain protein	1160	1127-1131
UP000007332	J9W2A2_LACBU	NO	LPQTG	YES	Lactobacillus buchneri CD034	Uncharacterized protein	680	648-652
UP000007332	J9W2H7_LACBU	NO	LPQTG	YES	Lactobacillus buchneri CD034	Uncharacterized protein	809	776-780
UP000007332	J9W2H2_LACBU	NO	LPQTG	YES	Lactobacillus buchneri CD034	Cell surface protein	396	362-366
UP000007332	J9W466_LACBU	NO	LPQTG	YES	Lactobacillus buchneri CD035	Uncharacterized protein	2650	2613-2617
UP000007332	J9W427_LACBU	NO	LPQTG	YES	Lactobacillus buchneri CD036	Uncharacterized protein	614	578-582
UP000051820	A0A0R1W536_9LACO	NO	LPQTG	YES	Lactobacillus suebicus DSM 5007 = KCTC 3549	Uncharacterized protein	609	573-577
UP000051820	A0A0R1WFK1_9LACO	NO	LPQTG	YES	Lactobacillus suebicus DSM 5007 = KCTC 3549	Adhesion exoprotein	1992	1954-1958
UP000051820	A0A0R1W0Z9_9LACO	NO	LPQTG	YES	Lactobacillus suebicus DSM 5007 = KCTC 3550	Lipoprotein	961	926-930
UP000051820	A0A0R1VUY2_9LACO	NO	LPQTG	YES	Lactobacillus suebicus DSM 5007 = KCTC 3549	Cell surface protein	2267	2231-2235
UP000051451	A0A0R1VNR9_9LACO	NO	LPQTG	YES	Lactobacillus ghanensis DSM 18630	Collagen adhesin	937	903-907
UP000051451	A0A0R1VWA2_9LACO	NO	LPQTG	YES	Lactobacillus ghanensis DSM 18631	Fructan hydrolase	1159	1123-1127
UP000051451	A0A0R1VT13_9LACO	NO	LPQTG	YES	Lactobacillus ghanensis DSM 18630	Uncharacterized protein	601	563-567
UP000050865	A0A0R2F7U0_9LACO	NO	LPHTG	YES	Lactobacillus camelliae DSM 22697 = JCM 13995	Uncharacterized protein	99	64-68
UP000050865	A0A0R2F7P7_9LACO	NO	LPHTG	YES	Lactobacillus camelliae DSM 22697 = JCM 13997	Cell wall surface anchor family protein	524	489-493
UP000050865	A0A0R2F7Q9_9LACO	NO	LPKTG	YES	Lactobacillus camelliae DSM 22697 = JCM 13996	Uncharacterized protein	789	756-760
UP000050865	A0A0R2EWA7_9LACO	NO	LPQTG	YES	Lactobacillus camelliae DSM 22697 = JCM 13995	Uncharacterized protein	299	267-271
UP000050865	A0A0R2F7S0_9LACO	NO	LPQTG	YES	Lactobacillus camelliae DSM 22697 = JCM 13996	Uncharacterized protein	372	335-339
UP000050865	A0A0R2EZH0_9LACO	NO	LPTTG	YES	Lactobacillus camelliae DSM 22697 = JCM 13996	Uncharacterized protein	927	891-895
UP000051804	A0A0R1JWM9_9LACO	NO	LPGTG	YES	Lactobacillus nasuensis JCM 17158	Endoglycosidase	578	543-547
UP000051804	A0A0R1JRI4_9LACO	NO	LPLTG	YES	Lactobacillus nasuensis JCM 17158	Uncharacterized protein	537	502-506
UP000051804	A0A0R1JIC3_9LACO	NO	LPQTG	YES	Lactobacillus nasuensis JCM 17158	Uncharacterized protein	112	73-77
UP000051804	A0A0R1JNT6_9LACO	NO	LPSTG	YES	Lactobacillus nasuensis JCM 17158	Outer membrane protein	1103	1068-1072
UP000051804	A0A0R1JX58_9LACO	NO	LPSTG	YES	Lactobacillus nasuensis JCM 17159	Uncharacterized protein	629	595-600
UP000051804	A0A0R1JNA5_9LACO	NO	LPSTG	YES	Lactobacillus nasuensis JCM 17159	Uncharacterized protein	630	596-600
UP000051804	A0A0R1JU82_9LACO	NO	LPTTG	YES	Lactobacillus nasuensis JCM 17158	Uncharacterized protein	1645	1611-1615
UP000051804	A0A0R1JVM8_9LACO	NO	LPTTG	YES	Lactobacillus nasuensis JCM 17158	Uncharacterized protein	915	883-887
UP000051804	A0A0R1JX70_9LACO	NO	LPVTG	YES	Lactobacillus nasuensis JCM 17159	Uncharacterized protein	557	527-531
UP000051330	A0A0R1MXD4_9LACO	NO	LPATG	YES	Lactobacillus perolens DSM 12744	Uncharacterized protein	789	750-755
UP000051330	A0A0R1MWK0_9LACO	NO	LPQTG	YES	Lactobacillus perolens DSM 12744	Uncharacterized protein	849	812-816
UP000051330	A0A0R1NDK0_9LACO	NO	LPQTG	YES	Lactobacillus perolens DSM 12745	Uncharacterized protein	1218	1182-1186
UP000051330	A0A0R1N4B0_9LACO	NO	LPQTG	YES	Lactobacillus perolens DSM 12744	Uncharacterized protein	449	405-409
UP000051330	A0A0R1N2V0_9LACO	NO	LPQTG	YES	Lactobacillus perolens DSM 12744	Uncharacterized protein	739	705-709
UP000051330	A0A0R1NE37_9LACO	NO	LPQTG	YES	Lactobacillus perolens DSM 12745	Uncharacterized protein	669	625-629
UP000051330	A0A0R1NE37_9LACO	NO	LPQTG	YES	Lactobacillus perolens DSM 12746	Uncharacterized protein	669	635-639
UP000051330	A0A0R1N3R4_9LACO	NO	LPQTG	YES	Lactobacillus perolens DSM 12747	Uncharacterized protein	1249	1212-1216
UP000051330	A0A0R1N616_9LACO	NO	LPSTG	YES	Lactobacillus perolens DSM 12744	Uncharacterized protein	549	514-518
UP000009311	I7LAS3_9LACO	NO	LPETG	YES	Lactobacillus pasteurii DSM 23907 = CRBIP 24.77	Mucus-binding protein	1241	1203-1207
UP000009311	I7JXL7_9LACO	NO	LPETG	YES	Lactobacillus pasteurii DSM 23907 = CRBIP 24.77	Mucus-binding protein	905	872-876
UP000009311	I7KKQ0_9LACO	NO	LPNTG	YES	Lactobacillus pasteurii DSM 23907 = CRBIP 24.76	Putative surface-anchored collagen-binding protein	963	926-930
UP000009311	I7LEB2_9LACO	NO	LPQTG	YES	Lactobacillus pasteurii DSM 23907 = CRBIP 24.77	Uncharacterized protein	893	860-864
UP000009311	I7LAT8_9LACO	NO	LPQTG	YES	Lactobacillus pasteurii DSM 23907 = CRBIP 24.78	Lipoprotein	1492	1459-1463
UP000009311	I7LDC4_9LACO	NO	LPQTG	YES	Lactobacillus pasteurii DSM 23907 = CRBIP 24.78	Cell surface protein	581	546-550
UP000009311	I7KKJ9_9LACO	NO	LPQTG	YES	Lactobacillus pasteurii DSM 23907 = CRBIP 24.76	Putative mucus binding protein	1102	1069-1073
UP000051450	A0A0R1HHJ4_9LACO	NO	LPKTG	YES	Lactobacillus algidus DSM 15638	Uncharacterized protein	2127	2090-2094
UP000051450	A0A0R1HHL3_9LACO	NO	LPQTG	YES	Lactobacillus algidus DSM 15638	Collagen adhesin	414	381-385
UP000051621	A0A0R1M158_9LACO	NO	LPQTG	YES	Lactobacillus capillatus DSM 19910	Fructan hydrolase	1076	1041-1045
UP000051621	A0A0R1M5P1_9LACO	NO	LPQTG	YES	Lactobacillus capillatus DSM 19911	Uncharacterized protein	307	265-269
UP000051977	A0A0R1N3F0_9LACO	NO	LPQTG	YES	Lactobacillus rapi DSM 19907 = JCM 15042	LPXTG-motif cell wall anchor domain-containing protein	3109	3072-3076
UP000051977	A0A0R1NAD2_9LACO	NO	LPQTG	YES	Lactobacillus rapi DSM 19907 = JCM 15042	Uncharacterized protein	844	810-814
UP000051977	A0A0R1ND65_9LACO	NO	LPQTG	YES	Lactobacillus rapi DSM 19907 = JCM 15042	LPXTG-motif protein cell wall anchor domain protein	982	949-953
UP000003645	A0A0D4CKT9_LACMC	NO	LPQTG	YES	Lactobacillus mucosae LM1	Uncharacterized protein	559	526-530
UP000003645	A0A0D4CK45_LACMC	NO	LPQTG	YES	Lactobacillus mucosae LM2	Uncharacterized protein	860	825-829
UP000003645	A0A0D4CKL3_LACMC	NO	LPQTG	YES	Lactobacillus mucosae LM2	5'-nucleotidase	738	703-707
UP000003645	A0A0D4CK62_LACMC	NO	LPQTG	YES	Lactobacillus mucosae LM1	Uncharacterized protein	2405	2368-2372
UP000051697	A0A0R1RGI9_9LACO	NO	LPQTG	YES	Lactobacillus oligofermentans DSM 15707 = LMG 22743	Uncharacterized protein	1181	1145-1149
UP000051697	A0A0R1RN77_9LACO	NO	LPQTG	YES	Lactobacillus oligofermentans DSM 15707 = LMG 22743	Uncharacterized protein	139	102-106
UP000009320	I7IVV8_9LACO	NO	LPETG	YES	Lactobacillus hominis DSM 23910 = CRBIP 24.179	Mucus binding protein	253	219-223
UP000009320	I7KGJ5_9LACO	NO	LPQTG	YES	Lactobacillus hominis DSM 23910 = CRBIP 24.179	Uncharacterized protein	521	486-490
UP000009320	I7L5I5_9LACO	NO	LPQTG	YES	Lactobacillus hominis DSM 23910 = CRBIP 24.180	Uncharacterized protein	3586	3548-3552
UP000009320	I7L7F4_9LACO	NO	LPQTG	YES	Lactobacillus hominis DSM 23910 = CRBIP 24.180	LPXTG-domain-containing protein cell wall anchor domain-containing protein	775	740-744
UP000009320	I7L601_9LACO	NO	LPQTG	YES	Lactobacillus hominis DSM 23910 = CRBIP 24.179	Uncharacterized protein	660	627-631
UP000009320	I7JUS7_9LACO	NO	LPQTG	YES	Lactobacillus hominis DSM 23910 = CRBIP 24.180	Uncharacterized protein	2480	2445-2449
UP000009320	I7L711_9LACO	NO	LPQTG	YES	Lactobacillus hominis DSM 23910 = CRBIP 24.181	Uncharacterized protein	2658	2622-2626
UP000009320	I7JU55_9LACO	NO	LPQTG	YES	Lactobacillus hominis DSM 23910 = CRBIP 24.182	Putative membrane protein	1642	1608-1612
UP000051315	A0A0R1W2J1_9LACO	NO	LPQTG	YES	Lactobacillus concavus DSM 17758	Uncharacterized protein	509	481-485
UP000051315	A0A0R1W7A5_9LACO	NO	LPQTG	YES	Lactobacillus concavus DSM 17759	Uncharacterized protein	1053	1016-1019
UP000050823	A0A0R1XA16_9LACO	NO	LPNTG	YES	Lactobacillus graminis DSM 20719	Uncharacterized protein	712	675-679
UP000050823	A0A0R1X839_9LACO	NO	LPQTG	YES	Lactobacillus graminis DSM 20719	LPXTG-motif cell wall anchor domain protein	912	878-882
UP000050823	A0A0R1WSM4_9LACO	NO	LPQTG	YES	Lactobacillus graminis DSM 20720	LPXTG-motif cell wall anchor domain protein	1738	1703-1707
UP000051054	A0A0R1WWD2_9LACO	NO	LPATG	YES	Lactobacillus hayakitensis DSM 18933 = JCM 14209	Uncharacterized protein	235	191-195
UP000051054	A0A0R1WN87_9LACO	NO	LPHTG	YES	Lactobacillus hayakitensis DSM 18933 = JCM 14209	Cell surface protein	657	617-621
UP000051054	A0A0R1WHI3_9LACO	NO	LPQTG	YES	Lactobacillus hayakitensis DSM 18933 = JCM 14209	Lpxtg-motif cell wall anchor domain protein	909	874-878
UP000051054	A0A0R1WJH5_9LACO	NO	LPQTG	YES	Lactobacillus hayakitensis DSM 18933 = JCM 14210	Uncharacterized protein	732	699-703
UP000051054	A0A0R1WIR0_9LACO	NO	LPQTG	YES	Lactobacillus hayakitensis DSM 18933 = JCM 14209	Uncharacterized protein	608	575-579
UP000051589	A0A0R2DF77_9LACO	NO	LPQTG	YES	Lactobacillus senmaizukei DSM 21775 = NBRC 103853	Uncharacterized protein	713	681-685
UP000050913	A0A0R1MMS9_9LACO	NO	LPQTG	YES	Lactobacillus zymae DSM 19395	Uncharacterized protein	699	665-669
UP000050913	A0A0R1N5V2_9LACO	NO	LPQTG	YES	Lactobacillus zymae DSM 19395	Surface protein	1118	1087-1091
UP000050913	A0A0R1MNB1_9LACO	NO	LPQTG	YES	Lactobacillus zymae DSM 19396	Uncharacterized protein	254	216-220
UP000006559	Q1WSI9_LACS1	NO	LPQTG	YES	Lactobacillus salivarius (strain UCC118)	Mucus binding protein	785	754-758
UP000006559	Q1WV61_LACS1	NO	LPQTG	YES	Lactobacillus salivarius (strain UCC118)	Mucus binding protein	1209	1171-1175
UP000006559	Q1WR54_LACS1	NO	LPQTG	YES	Lactobacillus salivarius (strain UCC118)	Surface protein	493	458-462
UP000001279	G2SPN9_LACRR	NO	LPQTG	YES	Lactobacillus ruminis (strain ATCC 27782 / RF3)	Sortase-anchored surface protein	1140	1099-1103
UP000001279	G2SPP1_LACRR	NO	LPSTG	YES	Lactobacillus ruminis (strain ATCC 27782 / RF3)	Sortase-anchored surface protein	507	471-475
UP000001285	G2KV82_LACSM	NO	LPQTG	YES	Lactobacillus sanfranciscensis (strain TMW 1.1304)	Levansucrase	832	794-798
UP000051084	A0A0R1US93_9LACO	NO	LPQTG	YES	Lactobacillus equigenerosi DSM 18793 = JCM 14505	Enhancing factor	1215	1179-1183
UP000051084	A0A0R1UP46_9LACO	NO	LPQTG	YES	Lactobacillus equigenerosi DSM 18793 = JCM 14505	Uncharacterized protein	518	485-489
UP000001991	A5VJV5_LACRD	NO	LPQTG	YES	Lactobacillus reuteri (strain DSM 20016)	LPXTG-motif cell wall anchor domain	637	604-608
UP000051672	A0A0R2AY44_9LACO	NO	LPQTG	YES	Lactobacillus brantae DSM 23927	Uncharacterized protein	579	542-546
UP000051672	A0A0R2B1Y8_9LACO	NO	LPQTG	YES	Lactobacillus brantae DSM 23927	Uncharacterized protein	755	722-726
UP000051672	A0A0R2B9T9_9LACO	NO	LPQTG	YES	Lactobacillus brantae DSM 23927	Uncharacterized protein	831	795-799
UP000051672	A0A0R2AZ74_9LACO	NO	LPSTG	YES	Lactobacillus brantae DSM 23927	Uncharacterized protein	800	766-740
UP000051461	A0A0R1GMQ1_9LACO	NO	LPKTG	YES	Lactobacillus bifermentans DSM 20003	Gy family cell surface protein	1597	1563-1567
UP000051461	A0A0R1GY61_9LACO	NO	LPKTG	YES	Lactobacillus bifermentans DSM 20004	Uncharacterized protein	828	787-791
UP000051461	A0A0R1H085_9LACO	NO	LPQTG	YES	Lactobacillus bifermentans DSM 20003	Uncharacterized protein	862	828-832
UP000051461	A0A0R1GXV0_9LACO	NO	LPQTG	YES	Lactobacillus bifermentans DSM 20004	Uncharacterized protein	920	879-883
UP000051461	A0A0R1GLY0_9LACO	NO	LPQTG	YES	Lactobacillus bifermentans DSM 20003	Mucus binding protein	2519	2486-2490
UP000051461	A0A0R1GPI5_9LACO	NO	LPQTG	YES	Lactobacillus bifermentans DSM 20003	Uncharacterized protein	940	904-908
UP000051589	A0A0R2DI07_9LACO	NO	LPQTG	YES	Lactobacillus senmaizukei DSM 21775 = NBRC 103853	Outer membrane protein	555	519-523
UP000051589	A0A0R2DG78_9LACO	NO	LPQTG	YES	Lactobacillus senmaizukei DSM 21775 = NBRC 103853	GY family cell surface protein	679	649-653
UP000051589	A0A0R2DHX0_9LACO	NO	LPVTG	YES	Lactobacillus senmaizukei DSM 21775 = NBRC 103853	Uncharacterized protein	479	446-450
UP000018559	V7I182_9LACO	NO	LPQTG	YES	Lactobacillus equi DPC 6820	Uncharacterized protein	1126	1091-1095
UP000018559	V7HW93_9LACO	NO	LPQTG	YES	Lactobacillus equi DPC 6820	Lactocepin or PrtP	1512	1476-1480
UP000051230	A0A0R1YL62_9LACO	NO	LPSTG	YES	Lactobacillus amylophilus DSM 20533 = JCM 1125	Cell wall surface anchor family protein	518	485-489
UP000002371	D5GZ92_LACCS	NO	LPQTG	YES	Lactobacillus crispatus (strain ST1)	Mucus-binding protein	3552	3515-3519
UP000050911	A0A0R1HLQ6_9LACO	NO	LPQTG	YES	Lactobacillus kimchicus JCM 15530	Uncharacterized protein	2467	2432-2436
UP000050911	A0A0R1HPN7_9LACO	NO	LPQTG	YES	Lactobacillus kimchicus JCM 15531	Cell surface protein	756	721-724
UP000051236	A0A0R1XSG0_9LACO	NO	LPITG	YES	Lactobacillus composti DSM 18527 = JCM 14202	Uncharacterized protein	621	590-594
UP000051236	A0A0R1Y0D8_9LACO	NO	LPQTG	YES	Lactobacillus composti DSM 18527 = JCM 14202	Pilus specific protein	577	545-549
UP000051236	A0A0R1XSQ7_9LACO	NO	LPQTG	YES	Lactobacillus composti DSM 18527 = JCM 14202	Uncharacterized protein	1181	1146-1150
UP000050969	A0A0R2MTE2_9LACO	NO	LPSTG	YES	Lactobacillus saniviri JCM 17471 = DSM 24301	Uncharacterized protein	196	155-159
UP000051378	A0A0R2DN87_9LACO	NO	LPQTG	YES	Lactobacillus saniviri JCM 17471 = DSM 24301	Uncharacterized protein	770	736-740
UP000051712	A0A0R1ZYR1_9LACO	NO	LPQTG	YES	Lactobacillus malefermentans DSM 5705 = KCTC 3548	Cell surface protein	404	370-375
UP000005583	C2EPS8_9LACO	NO	LPETG	YES	Lactobacillus ultunensis DSM 16047	Gram-positive signal peptide protein, YSIRK family	688	652-656
UP000051638	A0A0R2D990_9LACO	NO	LPQTG	YES	Lactobacillus rennini DSM 20253	Uncharacterized protein	787	754-760
UP000051036	A0A0R1UCA4_9LACO	NO	LPATG	YES	Lactobacillus kalixensis DSM 16043	Mucus binding protein mub	1517	1469-1473
UP000051036	A0A0R1U7P2_9LACO	NO	LPDTG	YES	Lactobacillus kalixensis DSM 16043	Mucus binding protein	772	737-741
UP000051036	A0A0R1UA48_9LACO	NO	LPQTG	YES	Lactobacillus kalixensis DSM 16043	Adhension protein	1032	994-998
UP000051036	A0A0R1UPA7_9LACO	NO	LPQTG	YES	Lactobacillus kalixensis DSM 16043	LPXTG-motif cell wall anchor domain protein	1048	1011-1015
UP000051500	A0A0R2KJ07_9LACO	NO	LPKTG	YES	Lactobacillus ceti DSM 22407	Uncharacterized protein	1041	1004-1008
UP000051500	A0A0R2KJ89_9LACO	NO	LPKTG	YES	Lactobacillus ceti DSM 22408	Uncharacterized protein	1050	1013-1017
UP000051500	A0A0R2KIT1_9LACO	NO	LPTTG	YES	Lactobacillus ceti DSM 22408	Uncharacterized protein	602	565-569
UP000051500	A0A0R2KMV1_9LACO	NO	LPTTG	YES	Lactobacillus ceti DSM 22409	Uncharacterized protein	684	649-653
UP000051679	A0A0R1ZHV9_9LACO	NO	LPATG	YES	Lactobacillus sharpeae JCM 1186 = DSM 20505	Uncharacterized protein	1797	1721-1725
UP000051679	A0A0R1ZHV9_9LACO	NO	LPATG	YES	Lactobacillus sharpeae JCM 1186 = DSM 20506	Uncharacterized protein	1797	1763-1767
UP000051679	A0A0R1ZKA6_9LACO	NO	LPDTG	YES	Lactobacillus sharpeae JCM 1186 = DSM 20506	Uncharacterized protein	375	313-317
UP000051679	A0A0R1ZHV9_9LACO	NO	LPDTG	YES	Lactobacillus sharpeae JCM 1186 = DSM 20507	Uncharacterized protein	1797	1709-1713
UP000051679	A0A0R1ZUI7_9LACO	NO	LPDTG	YES	Lactobacillus sharpeae JCM 1186 = DSM 20508	Uncharacterized protein	390	317-321
UP000051679	A0A0R1ZKB4_9LACO	NO	LPHTG	YES	Lactobacillus sharpeae JCM 1186 = DSM 20507	Uncharacterized protein	419	386-390
UP000051679	A0A0R1ZUG1_9LACO	NO	LPHTG	YES	Lactobacillus sharpeae JCM 1186 = DSM 20507	Uncharacterized protein	775	740-744
UP000051679	A0A0R1ZJ84_9LACO	NO	LPITG	YES	Lactobacillus sharpeae JCM 1186 = DSM 20506	Uncharacterized protein	2014	1926-1930
UP000051679	A0A0R1ZTB6_9LACO	NO	LPKTG	YES	Lactobacillus sharpeae JCM 1186 = DSM 20507	Uncharacterized protein	837	803-807
UP000051679	A0A0R1ZXT7_9LACO	NO	LPLTG	YES	Lactobacillus sharpeae JCM 1186 = DSM 20506	Pilus subunit protein	519	490-494
UP000051679	A0A0R1ZJ60_9LACO	NO	LPMTG	YES	Lactobacillus sharpeae JCM 1186 = DSM 20507	Uncharacterized protein	508	476-480
UP000051679	A0A0R1ZXH3_9LACO	NO	LPQTG	YES	Lactobacillus sharpeae JCM 1186 = DSM 20505	Uncharacterized protein	115	81-85
UP000051679	A0A0R1ZKA6_9LACO	NO	LPQTG	YES	Lactobacillus sharpeae JCM 1186 = DSM 20504	Uncharacterized protein	375	333-337
UP000051679	A0A0R1ZUI7_9LACO	NO	LPQTG	YES	Lactobacillus sharpeae JCM 1186 = DSM 20505	Uncharacterized protein	390	353-357
UP000051679	A0A0R1ZLA0_9LACO	NO	LPRTG	YES	Lactobacillus sharpeae JCM 1186 = DSM 20507	Uncharacterized protein	1137	1097-1101
UP000051679	A0A0R1ZHV9_9LACO	NO	LPVTG	YES	Lactobacillus sharpeae JCM 1186 = DSM 20509	Uncharacterized protein	1797	1746-1750
UP000051679	A0A0R1ZQ15_9LACO	NO	LPVTG	YES	Lactobacillus sharpeae JCM 1186 = DSM 20505	Cna B domain protein	662	624-628
UP000051565	A0A0R2JQ35_9LACO	NO	LPQTG	YES	Lactobacillus lindneri DSM 20690 = JCM 11027	Uncharacterized protein	610	576-580
UP000051264	A0A0R1RWW1_9LACO	NO	LPQTG	YES	Lactobacillus fuchuensis DSM 14340 = JCM 11249	Uncharacterized protein	485	454-458
UP000051264	A0A0R1RN02_9LACO	NO	LPQTG	YES	Lactobacillus fuchuensis DSM 14340 = JCM 11249	Uncharacterized protein	821	787-791
UP000051264	A0A0R1S3M2_9LACO	NO	LPQTG	YES	Lactobacillus fuchuensis DSM 14340 = JCM 11250	Uncharacterized protein	1255	1223-1227
UP000051264	A0A0R1RPP3_9LACO	NO	LPQTG	YES	Lactobacillus fuchuensis DSM 14340 = JCM 11251	Uncharacterized protein	1255	1223-1227
UP000051264	A0A0R1RZE1_9LACO	NO	LPQTG	YES	Lactobacillus fuchuensis DSM 14340 = JCM 11251	Uncharacterized protein	1689	1657-1661
UP000051264	A0A0R1S380_9LACO	NO	LPRTG	YES	Lactobacillus fuchuensis DSM 14340 = JCM 11249	Uncharacterized protein	648	613-617
UP000051248	A0A0R1KGI6_9LACO	NO	LPITG	YES	Lactobacillus nodensis DSM 19682 = JCM 14932 = NBRC 107160	Extracellular protein	890	813-817
UP000051248	A0A0R1KC56_9LACO	NO	LPKTG	YES	Lactobacillus nodensis DSM 19682 = JCM 14932 = NBRC 107160	Uncharacterized protein	436	403-407
UP000051248	A0A0R1K567_9LACO	NO	LPQTG	YES	Lactobacillus nodensis DSM 19682 = JCM 14932 = NBRC 107160	Adhesion exoprotein	759	729-733
UP000051248	A0A0R1KF10_9LACO	NO	LPQTG	YES	Lactobacillus nodensis DSM 19682 = JCM 14932 = NBRC 107160	Uncharacterized protein	883	848-852
UP000051324	A0A0R1TYD9_9LACO	NO	LPQTG	YES	Lactobacillus apodemi DSM 16634 = JCM 16172	Uncharacterized protein	957	923-927
UP000051324	A0A0R1U6Z9_9LACO	NO	LPQTG	YES	Lactobacillus apodemi DSM 16634 = JCM 16172	PrtP	1627	1593-1597
UP000051324	A0A0R1U1S1_9LACO	NO	LPQTG	YES	Lactobacillus apodemi DSM 16634 = JCM 16172	Uncharacterized protein	1630	1595-1599
UP000004625	G9ZPJ1_9LACO	NO	LPQTG	YES	Lactobacillus parafarraginis F0439	LPXTG-motif protein cell wall anchor domain protein	997	964-970
UP000004625	G9ZQ05_9LACO	NO	LPQTG	YES	Lactobacillus parafarraginis F0440	LPXTG-motif protein cell wall anchor domain protein	736	705-709
UP000004625	G9ZPC4_9LACO	NO	LPQTG	YES	Lactobacillus parafarraginis F0441	Fibro-slime domain protein	1162	1126-1130
UP000004625	G9ZQ91_9LACO	NO	LPQTG	YES	Lactobacillus parafarraginis F0441	Iron transport-associated domain protein	397	364-368
UP000051639	A0A0R2GXT2_9LACO	NO	LPQTG	YES	Lactobacillus ingluviei	sn-glycerol-3-phosphate transport atp-binding protein ugpc	2429	2393-2397
UP000051639	A0A0R2GTT4_9LACO	NO	LPQTG	YES	Lactobacillus ingluviei	Uncharacterized protein	619	588-592
UP000051639	A0A0R2GUR5_9LACO	NO	LPQTG	YES	Lactobacillus ingluviei	Lipoprotein (Vmca)	854	820-824
UP000051639	A0A0R2H778_9LACO	NO	LPQTG	YES	Lactobacillus ingluviei	LPXTG-motif cell wall anchor domain protein	703	673-677
UP000051639	A0A0R2H2M0_9LACO	NO	LPQTG	YES	Lactobacillus ingluviei	Uncharacterized protein	785	750-754
UP000051639	A0A0R2GX87_9LACO	NO	LPQTG	YES	Lactobacillus ingluviei	Uncharacterized protein	793	756-760
UP000033682	A0A0F4LNZ3_9LACO	NO	LPKTG	YES	Lactobacillus apis	Uncharacterized protein	747	710-714
UP000033682	A0A0F4LN58_9LACO	NO	LPKTG	YES	Lactobacillus apis	Lipoprotein	765	730-734
UP000033682	A0A0F4LP26_9LACO	NO	LPKTG	YES	Lactobacillus apis	Uncharacterized protein	649	612-616
UP000033682	A0A0F4LMF5_9LACO	NO	LPKTG	YES	Lactobacillus apis	Bacterial surface protein 26-residue PARCEL repeat (3 repeats)	765	730-734
UP000033682	A0A0F4LR13_9LACO	NO	LPKTG	YES	Lactobacillus apis	PF03382 family protein	661	626-630
UP000033682	A0A0F4LN04_9LACO	NO	LPQTG	YES	Lactobacillus apis	Uncharacterized protein	441	404-408
UP000033682	A0A0F4LRS4_9LACO	NO	LPQTG	YES	Lactobacillus apis	Uncharacterized protein	218	182-186
UP000033682	A0A0F4LNE3_9LACO	NO	LPQTG	YES	Lactobacillus apis	Uncharacterized protein	255	217-221
UP000033682	A0A0F4LUU4_9LACO	NO	LPQTG	YES	Lactobacillus apis	Uncharacterized protein	727	690-694
UP000033682	A0A0F4LM10_9LACO	NO	LPQTG	YES	Lactobacillus apis	LPXTG cell wall anchor domain protein	988	949-953
UP000033682	A0A0F4LQ01_9LACO	NO	LPQTG	YES	Lactobacillus apis	Uncharacterized protein	383	349-353
UP000033682	A0A0F4LSE8_9LACO	NO	LPVTG	YES	Lactobacillus apis	Uncharacterized protein	156	130-134
UP000027129	A0A062XAF9_9LACO	NO	LPETG	YES	Lactobacillus animalis	Cobaltochelatase subunit	1082	1046-1050
UP000027129	A0A062WZ51_9LACO	NO	LPQTG	YES	Lactobacillus animalis	Type VII secretion-associated serine protease mycosin, mycP	1537	1500-1504
UP000027129	A0A062X6X1_9LACO	NO	LPSTG	YES	Lactobacillus animalis	LPXTG cell wall anchor domain protein	565	530-534
UP000051783	A0A0R2MBB6_9LACO	NO	LPLTG	YES	Lactobacillus xiangfangensis	Uncharacterized protein	1781	1742-1746
UP000051783	A0A0R2M833_9LACO	NO	LPQTG	YES	Lactobacillus xiangfangensis	Cell surface protein	1218	1184-1188
UP000051783	A0A0R2MAB6_9LACO	NO	LPQTG	YES	Lactobacillus xiangfangensis	Uncharacterized protein	429	390-394
UP000051906	A0A0R2LQQ3_9LACO	NO	LPATG	YES	Lactobacillus paucivorans	Cell surface protein	383	349-351
UP000051906	A0A0R2LWS4_9LACO	NO	LPQTG	YES	Lactobacillus paucivorans	Uncharacterized protein	376	340-344
UP000051906	A0A0R2M0F2_9LACO	NO	LPQTG	YES	Lactobacillus paucivorans	Adhesion exoprotein	1042	1009-1013
UP000051906	A0A0R2LMJ6_9LACO	NO	LPQTG	YES	Lactobacillus paucivorans	Uncharacterized protein	858	825-829
UP000051906	A0A0R2LT69_9LACO	NO	LPQTG	YES	Lactobacillus paucivorans	Uncharacterized protein	846	814-818
UP000051906	A0A0R2M3Z2_9LACO	NO	LPQTG	YES	Lactobacillus paucivorans	Cell surface protein, gy family	682	652-656
UP000051906	A0A0R2LRT8_9LACO	NO	LPQTG	YES	Lactobacillus paucivorans	Uncharacterized protein	718	685-689
UP000051906	A0A0R2LT84_9LACO	NO	LPQTG	YES	Lactobacillus paucivorans	Uncharacterized protein	432	396-400
UP000051906	A0A0R2LTX0_9LACO	NO	LPQTG	YES	Lactobacillus paucivorans	Uncharacterized protein	812	781-785
UP000051906	A0A0R2LU61_9LACO	NO	LPQTG	YES	Lactobacillus paucivorans	Cell surface protein	641	607-611
UP000051906	A0A0R2LSD1_9LACO	NO	LPTTG	YES	Lactobacillus paucivorans	Uncharacterized protein	499	466-470
UP000050934	A0A0R2I8N1_9LACO	NO	LPITG	YES	Lactobacillus secaliphilus	Cell division protein FtsW	371	328-332
UP000050934	A0A0R2I1I4_9LACO	NO	LPQTG	YES	Lactobacillus secaliphilus	Uncharacterized protein	749	729-733
UP000050934	A0A0R2I271_9LACO	NO	LPQTG	YES	Lactobacillus secaliphilus	Uncharacterized protein	557	526-530
UP000050934	A0A0R2IBU0_9LACO	NO	LPQTG	YES	Lactobacillus secaliphilus	Uncharacterized protein	642	613-617
UP000012594	N2APX8_9LACO	NO	LPQTG	YES	Lactobacillus sp. ASF360	Rib/alpha/Esp surface antigen	1416	1380-1384
UP000012594	N1ZSH1_9LACO	NO	LPQTG	YES	Lactobacillus sp. ASF361	YSIRK family gram-positive signal peptide	3827	3793-3797
UP000012594	N2AHI0_9LACO	NO	LPQTG	YES	Lactobacillus sp. ASF361	Bacterial surface protein 26-residue	4528	4492-4496
UP000012594	N2ALZ0_9LACO	NO	LPQTG	YES	Lactobacillus sp. ASF362	Rib/alpha/Esp surface antigen	2625	2591-2595
UP000078582	A0A192H685_9LACO	NO	LPQTG	YES	Lactobacillus backii	Uncharacterized protein	1829	1791-1795
UP000078582	A0A192GZ56_9LACO	NO	LPQTG	YES	Lactobacillus backii	Uncharacterized protein	2753	2717-2721
UP000078582	A0A192H3K4_9LACO	NO	LPQTG	YES	Lactobacillus backii	Uncharacterized protein	2016	1983-1987
UP000078582	A0A192GZZ5_9LACO	NO	LPQTG	YES	Lactobacillus backii	Uncharacterized protein	911	877-8781
UP000078582	A0A192H4T1_9LACO	NO	LPTTG	YES	Lactobacillus backii	Uncharacterized protein	1677	1640-1644
UP000036225	A0A0H4LCD3_9LACO	NO	LPQTG	YES	Lactobacillus farciminis	Uncharacterized protein	737	707-711
UP000199599	A0A1I1SGU7_9LACO	NO	LPQTG	YES	Lactobacillus bombicola	Surface protein	786	753-757
UP000199599	A0A1I1TSH6_9LACO	NO	LPQTG	YES	Lactobacillus bombicola	LPXTG-motif cell wall anchor domain-containing protein	307	271-175
UP000051645	A0A0R2FJ64_9LACO	NO	LPQTG	YES	Lactobacillus selangorensis	Uncharacterized protein	115	79-83
UP000051491	A0A0R2KCW9_9LACO	NO	LPITG	YES	Lactobacillus acidipiscis	Uncharacterized protein	650	610-614
UP000030361	A0A1S6QGA9_9LACO	NO	LPQTG	YES	Lactobacillus curieae	LPXTG cell wall anchor domain-containing protein	772	738-742
UP000030361	A0A1S6QI99_9LACO	NO	LPQTG	YES	Lactobacillus curieae	Uncharacterized protein	3597	3560-3564
UP000029494	A0A089Y383_9LACO	NO	LPQTG	YES	Lactobacillus sp. wkB8	Internalin-like protein (LPXTG motif)	832	796-800
UP000029494	A0A089Y6S8_9LACO	NO	LPQTG	YES	Lactobacillus sp. wkB9	Chitinase	1179	1144-1148
UP000029494	A0A089Y386_9LACO	NO	LPQTG	YES	Lactobacillus sp. wkB10	Chitinase	654	618-622
UP000051886	A0A0R2LFU5_9LACO	NO	LPKTG	YES	Lactobacillus pobuzihii	Cell wall surface anchor family protein	894	857-861
UP000051886	A0A0R2LGX0_9LACO	NO	LPSTG	YES	Lactobacillus pobuzihii	Orf2	509	474-478
UP000051886	A0A0R2LFK5_9LACO	NO	LPTTG	YES	Lactobacillus pobuzihii	Uncharacterized protein	269	229-233
UP000037778	A0A0M9DCW0_9LACO	NO	LPQTG	YES	Lactobacillus kunkeei	Uncharacterized protein	1768	1732-1736
UP000037778	A0A0M9DC46_9LACO	NO	LPQTG	YES	Lactobacillus kunkeei	Uncharacterized protein	419	383-387
UP000037778	A0A0M9DB77_9LACO	NO	LPQTG	YES	Lactobacillus kunkeei	Uncharacterized protein	788	752-756
UP000037778	A0A0N0CT94_9LACO	NO	LPQTG	YES	Lactobacillus kunkeei	Uncharacterized protein	397	361-365
UP000037778	A0A0M9DC54_9LACO	NO	LPQTG	YES	Lactobacillus kunkeei	Uncharacterized protein	764	728-732
UP000198374	A0A1Z5I8Z4_9LACO	NO	LPHTG	YES	Lactobacillus mixtipabuli	Uncharacterized protein	505	470-474
UP000198374	A0A1Z5I8V8_9LACO	NO	LPQTG	YES	Lactobacillus mixtipabuli	Pilin	2635	2600-2604
UP000033558	A0A0F4LYD3_9LACO	NO	LPQTG	YES	Lactobacillus mellifer	Uncharacterized protein	787	751-755
UP000031397	A0A0C1LZS8_9LACO	NO	LPQTG	YES	Lactobacillus fructivorans	Uncharacterized protein	1148	1109-1113
UP000031397	A0A0C1M5W0_9LACO	NO	LPQTG	YES	Lactobacillus fructivorans	Uncharacterized protein	759	725-729
UP000031397	A0A0C1PR84_9LACO	NO	LPQTG	YES	Lactobacillus fructivorans	Uncharacterized protein	978	943-947
UP000031397	A0A0C1PR74_9LACO	NO	LPQTG	YES	Lactobacillus fructivorans	Uncharacterized protein	1503	1465-1469
UP000031397	A0A0C1Q1F9_9LACO	NO	LPRTG	YES	Lactobacillus fructivorans	Uncharacterized protein	302	268-272
UP000032279	A0A0D1A4V3_9LACO	NO	LPITG	YES	Lactobacillus wasatchensis	Cell wall surface anchor family protein	471	436-440
UP000061546	A0A0K2LD87_9LACO	NO	LPQTG	YES	Lactobacillus heilongjiangensis	Uncharacterized protein	737	707-711
UP000061546	A0A0K2L9D1_9LACO	NO	LPQTG	YES	Lactobacillus heilongjiangensis	Uncharacterized protein	1180	1147-1151
UP000061546	A0A0K2LEZ8_9LACO	NO	LPQTG	YES	Lactobacillus heilongjiangensis	Uncharacterized protein	438	404-408
UP000036106	A0A0H4QM71_9LACO	NO	LPQTG	YES	Lactobacillus ginsenosidimutans	Uncharacterized protein	781	747-751
UP000036106	A0A0H4R1C9_9LACO	NO	LPQTG	YES	Lactobacillus ginsenosidimutans	Uncharacterized protein	435	400-404
UP000030761	A0A087QBW5_LACGS	NO	LPKTG	YES	Lactobacillus gasseri SV-16A-US	Beta-N-acetylhexosaminidase	641	609-613
UP000030761	A0A087QBB3_LACGS	NO	LPQTG	YES	Lactobacillus gasseri SV-16A-US	Putative LPXTG-motif cell wall anchor domain protein	967	931-935
UP000030761	A0A087Q9P5_LACGS	NO	LPTTG	YES	Lactobacillus gasseri SV-16A-US	Putative gram positive anchor	884	848-852
UP000000362	Q03VZ5_LEUMM		LPETG	YES	Leuconostoc mesenteroides subsp. mesenteroides (strain ATCC 8293 / NCDO 523)	Uncharacterized protein	374	333-337
UP000000362	Q03WN9_LEUMM	NO	LPKTG	YES	Leuconostoc mesenteroides subsp. mesenteroides (strain ATCC 8293 / NCDO 523)	Uncharacterized protein	762	724-728
UP000000362	Q03VZ6_LEUMM	NO	LPSTG	YES	Leuconostoc mesenteroides subsp. mesenteroides (strain ATCC 8293 / NCDO 523)	Uncharacterized protein	508	473-477
UP000006299	K0DFS2_LEUCJ	NO	LPATG	YES	Leuconostoc carnosum (strain JB16)	SpaA domain-containing protein	363	327-331
UP000006299	K0D554_LEUCJ	NO	LPKTG	YES	Leuconostoc carnosum (strain JB16)	Putative mucus-binding protein	1181	1148-1152
UP000006299	K0DEU5_LEUCJ	NO	LPSTG	YES	Leuconostoc carnosum (strain JB16)	Uncharacterized protein	508	473-477
UP000002196	Q9CG09_LACLA	NO	LPETG	YES	Lactococcus lactis subsp. lactis (strain IL1403) (Streptococcus lactis)	GRAM_POS_ANCHORING domain-containing protein	653	617-621
UP000002196	Q9CHH3_LACLA	NO	LPFTG	YES	Lactococcus lactis subsp. lactis (strain IL1403) (Streptococcus lactis)	SpaA domain-containing protein	614	577-581
UP000002196	Q9CH86_LACLA	NO	LPKTG	YES	Lactococcus lactis subsp. lactis (strain IL1403) (Streptococcus lactis)	Uncharacterized protein	1063	1028-1032
UP000002196	Q9CJ55_LACLA	NO	LPKTG	YES	Lactococcus lactis subsp. lactis (strain IL1403) (Streptococcus lactis)	GRAM_POS_ANCHORING domain-containing protein	1983	1949-1953
UP000008520	F9VFN1_LACGL	NO	LPATG	YES	Lactococcus garvieae (strain Lg2) (Enterococcus seriolicida)	Cell surface protein	589	552-556
UP000033166	A0A0D6DUX2_9LACT	NO	LPATG	YES	Lactococcus piscium MKFS47	Pilus ancillary protein, adhesin	1243	942-946
UP000033166	A0A0D6DVR6_9LACT	NO	LPATG	YES	Lactococcus piscium MKFS47	Arginine/glutamine transport substrate-binding and permease protein	531	436-440
UP000033166	A0A0D6E0M8_9LACT	NO	LPKTG	YES	Lactococcus piscium MKFS47	LPXTG-motif-containing cell surface protein	258	227-231
UP000033166	A0A0D6DVD9_9LACT	NO	LPSTG	YES	Lactococcus piscium MKFS47	Pilus major backbone protein	500	465-469
UP000033166	A0A0D6E0N3_9LACT	NO	LPVTG	YES	Lactococcus piscium MKFS47	GRAM_POS_ANCHORING domain-containing protein	427	394-398
UP000218181	A0A2A5RII6_9LACT	NO	LPKTG	YES	Lactococcus fujiensis JCM 16395	Membrane protein	1776	1744-1748
UP000218181	A0A2A5RK43_9LACT	NO	LPKTG	YES	Lactococcus fujiensis JCM 16395	GRAM_POS_ANCHORING domain-containing protein	1199	1166-1170
UP000218689	A0A224XBN3_9LACT	NO	LPATG	YES	Lactococcus reticulitermitis (Strain: Rs-Y01)	ABC transmembrane type-1 domain-containing protein	532	436-440
UP000218689	A0A224X293_9LACT	NO	LPATG	YES	Lactococcus reticulitermitis (Strain: Rs-Y01)	MucBP domain-containing protein	1309	1256-1260
UP000218689	A0A224X1G4_9LACT	NO	LPATG	YES	Lactococcus reticulitermitis (Strain: Rs-Y01)	Uncharacterized protein	117	82-86
UP000218689	A0A224X9X7_9LACT	NO	LPDTG	YES	Lactococcus reticulitermitis (Strain: Rs-Y01)	GRAM_POS_ANCHORING domain-containing protein	1286	1253-1257
UP000218689	A0A224XCF6_9LACT	NO	LPETG	YES	Lactococcus reticulitermitis (Strain: Rs-Y01)	Uncharacterized protein	1213	1160-1164
UP000218689	A0A224X293_9LACT	NO	LPKTG	YES	Lactococcus reticulitermitis (Strain: Rs-Y01)	MucBP domain-containing protein	1309	1270-1274
UP000218689	A0A224XEI5_9LACT	NO	LPRTG	YES	Lactococcus reticulitermitis (Strain: Rs-Y01)	Uncharacterized protein	106	65-69
UP000218689	A0A224WXN0_9LACT	NO	LPSTG	YES	Lactococcus reticulitermitis (Strain: Rs-Y01)	Uncharacterized protein	562	525-529
UP000218689	A0A224X293_9LACT	NO	LPTTG	YES	Lactococcus reticulitermitis (Strain: Rs-Y01)	MucBP domain-containing protein	1309	1263-1267
UP000218689	A0A224XCF6_9LACT	NO	LPTTG	YES	Lactococcus reticulitermitis (Strain: Rs-Y01)	Uncharacterized protein	1213	1177-1181
UP000218689	A0A224X4A7_9LACT	NO	LPVTG	YES	Lactococcus reticulitermitis (Strain: Rs-Y01)	Uncharacterized protein	108	65-69
UP000218689	A0A224X5X5_9LACT	NO	LPVTG	YES	Lactococcus reticulitermitis (Strain: Rs-Y01)	Gram_pos_anchor domain-containing protein	111	69-73
UP000245021	A0A2R5HE39_9LACT	NO	LPDTG	YES	Lactococcus termiticola (Strain: NtB2)	GRAM_POS_ANCHORING domain-containing protein	103	66-70
UP000245021	A0A2R5HCZ5_9LACT	NO	LPFTG	YES	Lactococcus termiticola (Strain: NtB2)	SpaA domain-containing protein	643	607-611
UP000245021	A0A2R5HKY6_9LACT	NO	LPFTG	YES	Lactococcus termiticola (Strain: NtB2)	Big_6 domain-containing protein	365	330-334
UP000245021	A0A2R5HD06_9LACT	NO	LPKTG	YES	Lactococcus termiticola (Strain: NtB2)	Uncharacterized protein	240	207-211
UP000269374	A0A387BCV9_9LACT	NO	LPDTG	YES	Lactococcus sp. 1JSPR-7	LPXTG cell wall anchor domain-containing protein	1490	1458-1462
UP000269374	A0A387BBX1_9LACT	NO	LPFTG	YES	Lactococcus sp. 1JSPR-7	Uncharacterized protein	532	496-500
UP000269374	A0A387B8F3_9LACT	NO	LPFTG	YES	Lactococcus sp. 1JSPR-7	Uncharacterized protein	681	645-649
UP000269374	A0A387BN35_9LACT	NO	LPFTG	YES	Lactococcus sp. 1JSPR-7	Uncharacterized protein	852	817-821
UP000269374	A0A387BGF4_9LACT	NO	LPKTG	YES	Lactococcus sp. 1JSPR-7	GramPos_pilinD1 domain-containing protein	238	198-202
UP000269374	A0A387B7X2_9LACT	NO	LPKTG	YES	Lactococcus sp. 1JSPR-7	LPXTG cell wall anchor domain-containing protein	99	67-71
UP000269374	A0A387BJ75_9LACT	NO	LPKTG	YES	Lactococcus sp. 1JSPR-7	LPXTG cell wall anchor domain-containing protein	108	69-73
UP000269374	A0A387BHN0_9LACT	NO	LPKTG	YES	Lactococcus sp. 1JSPR-7	LPXTG cell wall anchor domain-containing protein	666	631-635
UP000269374	A0A387B838_9LACT	NO	LPKTG	YES	Lactococcus sp. 1JSPR-7	LPXTG cell wall anchor domain-containing protein	233	194-198
UP000269374	A0A387BEB1_9LACT	NO	LPKTG	YES	Lactococcus sp. 1JSPR-7	LPXTG cell wall anchor domain-containing protein	96	64-68
UP000269374	A0A387BU13_9LACT	NO	LPKTG	YES	Lactococcus sp. 1JSPR-7	LPXTG cell wall anchor domain-containing protein	90	61-65
UP000269374	A0A387BD12_9LACT	NO	LPKTG	YES	Lactococcus sp. 1JSPR-7	LPXTG cell wall anchor domain-containing protein	103	67-71
UP000269374	A0A387BED8_9LACT	NO	LPRTG	YES	Lactococcus sp. 1JSPR-7	LPXTG cell wall anchor domain-containing protein	586	555-559
UP000269374	A0A387BFE6_9LACT	NO	LPSTG	YES	Lactococcus sp. 1JSPR-7	LPXTG cell wall anchor domain-containing protein	1142	1107-1111
UP000269374	A0A387B859_9LACT	NO	LPSTG	YES	Lactococcus sp. 1JSPR-7	BspA family leucine-rich repeat surface protein	917	886-890
UP000269374	A0A387BL13_9LACT	NO	LPSTG	YES	Lactococcus sp. 1JSPR-7	BspA family leucine-rich repeat surface protein	800	770-774
UP000000212	K8E600_CARML	NO	LPDTG	YES	Carnobacterium maltaromaticum LMA28	LPXTG-motif cell wall anchor domain protein	119	64-68
UP000000212	K8EFI5_CARML	NO	LPETG	YES	Carnobacterium maltaromaticum LMA28	LPXTG-motif cell wall anchor domain protein	662	628-632
UP000000212	K8EVB1_CARML	NO	LPKTG	YES	Carnobacterium maltaromaticum LMA28	LPXTG-motif cell wall anchor domain protein	1713	1676-1680
UP000000212	K8E846_CARML	NO	LPQTG	YES	Carnobacterium maltaromaticum LMA28	Uncharacterized protein	98	73-77
UP000000212	K8E6Z7_CARML	NO	LPQTG	YES	Carnobacterium maltaromaticum LMA28	LPXTG-motif cell wall anchor domain protein	113	83-87
UP000000212	K8ECY2_CARML	NO	LPQTG	YES	Carnobacterium maltaromaticum LMA28	LPXTG-motif cell wall anchor domain protein	100	68-72
UP000000212	K8EV01_CARML	NO	LPQTG	YES	Carnobacterium maltaromaticum LMA28	Uncharacterized protein	117	74-78
UP000000212	K8ENM7_CARML	NO	LPSTG	YES	Carnobacterium maltaromaticum LMA28	LPXTG-motif cell wall anchor domain protein	765	730-734
UP000051658	A0A0R2HXT4_CARDV	NO	LPKTG	YES	Carnobacterium divergens DSM 20623	Uncharacterized protein	475	441-445
UP000051658	A0A0R2HYY5_CARDV	NO	LPNTG	YES	Carnobacterium divergens DSM 20623	Cell wall-associated surface protein	1262	1148-1152
UP000051658	A0A0R2HVQ3_CARDV	NO	LPQTG	YES	Carnobacterium divergens DSM 20623	Gram_pos_anchor domain-containing protein	111	69-73
UP000051658	A0A0R2HWA6_CARDV	NO	LPQTG	YES	Carnobacterium divergens DSM 20623	Uncharacterized protein	113	80-84
UP000051658	A0A0R2HY28_CARDV	NO	LPQTG	YES	Carnobacterium divergens DSM 20623	GRAM_POS_ANCHORING domain-containing protein	87	50-54
UP000051658	A0A0R2I4G0_CARDV	NO	LPQTG	YES	Carnobacterium divergens DSM 20623	GRAM_POS_ANCHORING domain-containing protein	107	76-80
UP000051658	A0A0R2HWU8_CARDV	NO	LPQTG	YES	Carnobacterium divergens DSM 20623	GRAM_POS_ANCHORING domain-containing protein	659	627-631
UP000051658	A0A0R2I926_CARDV	NO	LPQTG	YES	Carnobacterium divergens DSM 20623	Uncharacterized protein	118	75-79
UP000001415	Q839C8_ENTFA	NO	LPATG	YES	Enterococcus faecalis (strain ATCC 700802 / V583)	Amino acid ABC transporter, amino acid-binding/permease protein	527	440-444
UP000001415	Q82Z83_ENTFA	NO	LPATG	YES	Enterococcus faecalis (strain ATCC 700802 / V583)	Cell wall surface anchor family protein	129	84-88
UP000001415	Q839L6_ENTFA	NO	LPHTG	YES	Enterococcus faecalis (strain ATCC 700802 / V583)	Aggregation substance, putative	1305	1272-1276
UP000001415	Q82YS1_ENTFA	NO	LPHTG	YES	Enterococcus faecalis (strain ATCC 700802 / V583)	Surface exclusion protein Sea1	890	857-861
UP000001415	Q82YN0_ENTFA	NO	LPHTG	YES	Enterococcus faecalis (strain ATCC 700802 / V583)	Surface protein PrgC	285	251-255
UP000001415	Q836L2_ENTFA	NO	LPKTG	YES	Enterococcus faecalis (strain ATCC 700802 / V583)	Collagen adhesin protein	674	640-644
UP000001415	Q839U0_ENTFA	NO	LPKTG	YES	Enterococcus faecalis (strain ATCC 700802 / V583)	5'-nucleotidase family protein	1313	1278-1282
UP000001415	Q832K2_ENTFA	NO	LPKTG	YES	Enterococcus faecalis (strain ATCC 700802 / V583)	Cell wall surface anchor family protein	1499	1463-1467
UP000001415	Q837T1_ENTFA	NO	LPKTG	YES	Enterococcus faecalis (strain ATCC 700802 / V583)	Cell wall surface anchor family protein	112	76-80
UP000001415	Q82YN1_ENTFA	NO	LPKTG	YES	Enterococcus faecalis (strain ATCC 700802 / V583)	Aggregation substance PrgB	1305	1270-1274
UP000001415	Q832H6_ENTFA	NO	LPKTG	YES	Enterococcus faecalis (strain ATCC 700802 / V583)	Gram_pos_anchor domain-containing protein	109	72-76
UP000001415	ASA1_ENTFA	YES	LPQTG	YES	Enterococcus faecalis (strain ATCC 700802 / V583)	Aggregation substance	1296	1261-1265
UP000001415	Q838H0_ENTFA	NO	LPQTG	YES	Enterococcus faecalis (strain ATCC 700802 / V583)	Aggregation substance	1305	1270-1274
UP000001415	H7C6Y7_ENTFA	NO	LPQTG	YES	Enterococcus faecalis (strain ATCC 700802 / V583)	Surface exclusion protein PrgA	891	857-861
UP000001415	Q82ZI0_ENTFA	NO	LPRTG	YES	Enterococcus faecalis (strain ATCC 700802 / V583)	Cell wall surface anchor family protein	120	85-89
UP000001415	Q82ZS9_ENTFA	NO	LPRTG	YES	Enterococcus faecalis (strain ATCC 700802 / V583)	Cell wall surface anchor family protein	122	85-89
UP000001415	Q82Z26_ENTFA	NO	LPRTG	YES	Enterococcus faecalis (strain ATCC 700802 / V583)	Cell wall surface anchor family protein	120	85-89
UP000001415	Q830T6_ENTFA	NO	LPRTG	YES	Enterococcus faecalis (strain ATCC 700802 / V583)	Cell wall surface anchor family protein	122	89-93
UP000001415	Q836L8_ENTFA	NO	LPSTG	YES	Enterococcus faecalis (strain ATCC 700802 / V583)	Cell wall surface anchor family protein	625	591-595
UP000001415	Q82ZM8_ENTFA	NO	LPSTG	YES	Enterococcus faecalis (strain ATCC 700802 / V583)	Polysaccharide lyase, family 8	1372	1338-1342
UP000001415	Q839L2_ENTFA	NO	LPYTG	YES	Enterococcus faecalis (strain ATCC 700802 / V583)	Cell wall surface anchor family protein	282	250-254
UP000002895	I6SB22_ENTHA	NO	LPATG	YES	Enterococcus hirae (strain ATCC 9790 / DSM 20160 / JCM 8729 / LMG 6399 / NBRC 3181 / NCIMB 6459 / NCDO 1258)	Amino acid ABC transporter amino acid-binding/permease protein	531	444-448
UP000002895	I6SFJ3_ENTHA	NO	LPDTG	YES	Enterococcus hirae (strain ATCC 9790 / DSM 20160 / JCM 8729 / LMG 6399 / NBRC 3181 / NCIMB 6459 / NCDO 1258)	Cell wall surface anchor family protein
UP000002895	I6S0K3_ENTHA	NO	LPETG	YES	Enterococcus hirae (strain ATCC 9790 / DSM 20160 / JCM 8729 / LMG 6399 / NBRC 3181 / NCIMB 6459 / NCDO 1258)	Uncharacterized protein	153	115-119
UP000002895	I6TA67_ENTHA	NO	LPETG	YES	Enterococcus hirae (strain ATCC 9790 / DSM 20160 / JCM 8729 / LMG 6399 / NBRC 3181 / NCIMB 6459 / NCDO 1258)	Cell wall surface anchor family protein	552	470-474
UP000002895	I6SDS0_ENTHA	NO	LPKTG	YES	Enterococcus hirae (strain ATCC 9790 / DSM 20160 / JCM 8729 / LMG 6399 / NBRC 3181 / NCIMB 6459 / NCDO 1258)	Uncharacterized protein	622	584-590
UP000002895	I6TE07_ENTHA	NO	LPKTG	YES	Enterococcus hirae (strain ATCC 9790 / DSM 20160 / JCM 8729 / LMG 6399 / NBRC 3181 / NCIMB 6459 / NCDO 1258)	Polysaccharide lyase family protein 8	1510	1472-1476
UP000002895	I6SXJ9_ENTHA	NO	LPMTG	YES	Enterococcus hirae (strain ATCC 9790 / DSM 20160 / JCM 8729 / LMG 6399 / NBRC 3181 / NCIMB 6459 / NCDO 1258)	Collagen_bind domain-containing protein	1592	1555-1559
UP000002895	I6T0V9_ENTHA	NO	LPQTG	YES	Enterococcus hirae (strain ATCC 9790 / DSM 20160 / JCM 8729 / LMG 6399 / NBRC 3181 / NCIMB 6459 / NCDO 1258)	Gram_pos_anchor domain-containing protein	113	76-80
UP000005269	I3TYD9_ENTFD	NO	LPATG	YES	Enterococcus faecium (strain ATCC BAA-472 / TX0016 / DO)	Amino acid ABC superfamily ATP binding cassette transporter, membrane protein	530	443-447
UP000005269	Q3Y2C9_ENTFD	NO	LPATG	YES	Enterococcus faecium (strain ATCC BAA-472 / TX0016 / DO)	LPXTG family cell surface protein Fms13	565	530-534
UP000005269	Q3Y373_ENTFD	YES	LPETG	YES	Enterococcus faecium (strain ATCC BAA-472 / TX0016 / DO)	LPXTG family cell surface protein Fms2	324	288-292
UP000005269	Q3Y3D1_ENTFD	NO	LPETG	YES	Enterococcus faecium (strain ATCC BAA-472 / TX0016 / DO)	Pilus subunit protein	1129	1094-1098
UP000005269	I3U5K9_ENTFD	NO	LPKTG	YES	Enterococcus faecium (strain ATCC BAA-472 / TX0016 / DO)	Collagen-binding MSCRAMM Scm (Fms10)	603	568-572
UP000005269	I3TZI3_ENTFD	NO	LPKTG	YES	Enterococcus faecium (strain ATCC BAA-472 / TX0016 / DO)	LPXTG family cell surface protein Fms12	1080	1047-1051
UP000005269	I3U2A3_ENTFD	NO	LPKTG	YES	Enterococcus faecium (strain ATCC BAA-472 / TX0016 / DO)	LPXTG family cell surface protein Fms7	637	604-608
UP000005269	Q3Y3D3_ENTFD	NO	LPSTG	YES	Enterococcus faecium (strain ATCC BAA-472 / TX0016 / DO)	Pilus subunit protein EbpCfm (Fms9)	625	591-595
UP000008520	F9VFN1_LACGL	NO	LPATG	YES	Lactococcus garvieae (strain Lg2)	Cell surface protein	589	552-556
UP000008520	F9VC58_LACGL	NO	LPATG	YES	Lactococcus garvieae (strain Lg2)	Amino acid ABC transporter substrate-binding component	523	434-438
UP000010296	E6LCX0_ENTI1	NO	LPATG	YES	Enterococcus italicus (strain DSM 15952 / LMG 22039 / TP 1.5)	LPXTG-motif cell wall anchor domain protein	1228	1190-1194
UP000010296	E6LIP1_ENTI1	NO	LPKTG	YES	Enterococcus italicus (strain DSM 15952 / LMG 22039 / TP 1.5)	LPXTG-motif cell wall anchor domain protein	250	220-224
UP000010296	E6LCW9_ENTI1	NO	LPNTG	YES	Enterococcus italicus (strain DSM 15952 / LMG 22039 / TP 1.5)	LPXTG-motif cell wall anchor domain protein	257	218-222
UP000010296	E6LCW8_ENTI1	NO	LPSTG	YES	Enterococcus italicus (strain DSM 15952 / LMG 22039 / TP 1.5)	LPXTG-motif cell wall anchor domain protein	497	462-466
UP000012675	C9A9Q2_ENTCA	NO	LPATG	YES	Enterococcus casseliflavus EC20	LPXTG-domain-containing protein cell wall anchor domain protein	122	68-72
UP000012675	C9A5E8_ENTCA	NO	LPATG	YES	Enterococcus casseliflavus EC20	Uncharacterized protein	1094	1057-1061
UP000012675	C9A4L4_ENTCA	NO	LPATG	YES	Enterococcus casseliflavus EC20	Fimbrial isopeptide formation D2 domain-containing protein	622	591-595
UP000012675	C9ABD6_ENTCA	NO	LPFTG	YES	Enterococcus casseliflavus EC20	Uncharacterized protein	576	541-545
UP000012675	C9A5Q9_ENTCA	NO	LPKTG	YES	Enterococcus casseliflavus EC20	LPXTG-domain-containing protein cell wall anchor domain protein	650	619-621
UP000012675	C9A6Y4_ENTCA	NO	LPKTG	YES	Enterococcus casseliflavus EC20	LPXTG-domain-containing protein cell wall anchor domain protein	1975	1936-1940
UP000012675	M9T896_ENTCA	NO	LPKTG	YES	Enterococcus casseliflavus EC20	LPXTG-domain-containing protein cell wall anchor domain protein	1725	1689-1693
UP000012675	C9AD29_ENTCA	NO	LPQTG	YES	Enterococcus casseliflavus EC20	LPXTG-domain-containing protein cell wall anchor domain protein	1437	1400-1404
UP000012675	C9AA97_ENTCA	NO	LPQTG	YES	Enterococcus casseliflavus EC20	LPXTG-domain-containing protein cell wall anchor domain protein	109	71-75
UP000013777	R2RWZ5_9ENTE	NO	LPATG	YES	Enterococcus asini ATCC 700915	His/Glu/Gln/Arg/opine family amino ABC transporter, permease, 3-TM region	530	443-447
UP000013777	R2RLC6_9ENTE	NO	LPKTG	YES	Enterococcus asini ATCC 700915	Fimbrial isopeptide formation D2 domain-containing protein	508	470-474
UP000013777	R2PTZ3_9ENTE	NO	LPSTG	YES	Enterococcus asini ATCC 700915	Fimbrial isopeptide formation D2 domain-containing protein	655	621-625
UP000013777	R2PSG0_9ENTE	NO	LPSTG	YES	Enterococcus asini ATCC 700915	LPXTG-domain-containing protein cell wall anchor domain	363	328-332
UP000013777	R2S0B1_9ENTE	NO	LPSTG	YES	Enterococcus asini ATCC 700915	Fimbrial isopeptide formation D2 domain-containing protein	636	601-605
UP000013777	R2RV62_9ENTE	NO	LPSTG	YES	Enterococcus asini ATCC 700915	LPXTG-domain-containing protein cell wall anchor domain	1262	1227-1231
UP000013782	R2SXY5_9ENTE	NO	LPETG	YES	Enterococcus pallens ATCC BAA-351	Uncharacterized protein	1121	1081-1085
UP000013782	R2S682_9ENTE	NO	LPFTG	YES	Enterococcus pallens ATCC BAA-351	SpaA domain-containing protein	581	546-550
UP000013782	R2SSE2_9ENTE	NO	LPFTG	YES	Enterococcus pallens ATCC BAA-351	Uncharacterized protein	1554	1512-1516
UP000013782	R2Q991_9ENTE	NO	LPHTG	YES	Enterococcus pallens ATCC BAA-351	LPXTG-domain-containing protein cell wall anchor domain	494	459-463
UP000013782	R2QFB6_9ENTE	NO	LPKTG	YES	Enterococcus pallens ATCC BAA-351	LPXTG-domain-containing protein cell wall anchor domain	1606	1574-1578
UP000013782	R2QBM4_9ENTE	NO	LPKTG	YES	Enterococcus pallens ATCC BAA-351	LPXTG-domain-containing protein cell wall anchor domain	253	218-222
UP000013782	R2SMR5_9ENTE	NO	LPKTG	YES	Enterococcus pallens ATCC BAA-351	LPXTG-domain-containing protein cell wall anchor domain	127	87-91
UP000013782	R2QK02_9ENTE	NO	LPKTG	YES	Enterococcus pallens ATCC BAA-351	LPXTG-domain-containing protein cell wall anchor domain	357	323-327
UP000013782	R2SD41_9ENTE	NO	LPKTG	YES	Enterococcus pallens ATCC BAA-351	LPXTG-domain-containing protein cell wall anchor domain	131	91-95
UP000013782	R2QJB0_9ENTE	NO	LPKTG	YES	Enterococcus pallens ATCC BAA-351	LPXTG-domain-containing protein cell wall anchor domain	510	476-480
UP000013782	R2SFK2_9ENTE	NO	LPKTG	YES	Enterococcus pallens ATCC BAA-351	Fimbrial isopeptide formation D2 domain-containing protein	560	525-529
UP000013782	R2S0D5_9ENTE	NO	LPKTG	YES	Enterococcus pallens ATCC BAA-351	LPXTG-domain-containing protein cell wall anchor domain	269	235-239
UP000013782	R2SLD7_9ENTE	NO	LPLTG	YES	Enterococcus pallens ATCC BAA-351	LPXTG-domain-containing protein cell wall anchor domain	565	533-537
UP000013782	R2SY77_9ENTE	NO	LPNTG	YES	Enterococcus pallens ATCC BAA-351	LPXTG-domain-containing protein cell wall anchor domain	263	213-217
UP000013782	R2Q9D3_9ENTE	NO	LPNTG	YES	Enterococcus pallens ATCC BAA-351	Fimbrial isopeptide formation D2 domain-containing protein	550	517-521
UP000013782	R2QM44_9ENTE	NO	LPQTG	YES	Enterococcus pallens ATCC BAA-351	LPXTG-domain-containing protein cell wall anchor domain	529	493-497
UP000013782	R2QCP9_9ENTE	NO	LPQTG	YES	Enterococcus pallens ATCC BAA-351	LPXTG-domain-containing protein cell wall anchor domain	116	76-80
UP000013782	R2RVK2_9ENTE	NO	LPQTG	YES	Enterococcus pallens ATCC BAA-351	LPXTG-domain-containing protein cell wall anchor domain	258	224-228
UP000013782	R2Q6V1_9ENTE	NO	LPQTG	YES	Enterococcus pallens ATCC BAA-351	LPXTG-domain-containing protein cell wall anchor domain	252	218-222
UP000013782	R2PNZ3_9ENTE	NO	LPQTG	YES	Enterococcus pallens ATCC BAA-351	LPXTG-domain-containing protein cell wall anchor domain	1188	1149-1153
UP000013782	R2SMU2_9ENTE	NO	LPQTG	YES	Enterococcus pallens ATCC BAA-351	LPXTG-domain-containing protein cell wall anchor domain	235	201-205
UP000013782	R2PNK9_9ENTE	NO	LPQTG	YES	Enterococcus pallens ATCC BAA-351	Gram_pos_anchor domain-containing protein	240	206-210
UP000013782	R2SQ80_9ENTE	NO	LPQTG	YES	Enterococcus pallens ATCC BAA-351	LPXTG-domain-containing protein cell wall anchor domain	1091	1061-1065
UP000013782	R2Q4Q1_9ENTE	NO	LPQTG	YES	Enterococcus pallens ATCC BAA-351	LPXTG-domain-containing protein cell wall anchor domain	241	207-211
UP000013782	R2SQ75_9ENTE	NO	LPQTG	YES	Enterococcus pallens ATCC BAA-351	Uncharacterized protein	1017	979-983
UP000013782	R2SY77_9ENTE	NO	LPQTG	YES	Enterococcus pallens ATCC BAA-351	LPXTG-domain-containing protein cell wall anchor domain	263	229-233
UP000013782	R2QEK4_9ENTE	NO	LPQTG	YES	Enterococcus pallens ATCC BAA-351	LPXTG-domain-containing protein cell wall anchor domain	880	845-849
UP000013782	R2SQZ4_9ENTE	NO	LPQTG	YES	Enterococcus pallens ATCC BAA-351	LPXTG-domain-containing protein cell wall anchor domain	398	362-366
UP000013782	R2QQ46_9ENTE	NO	LPQTG	YES	Enterococcus pallens ATCC BAA-351	LPXTG-domain-containing protein cell wall anchor domain	256	222-226
UP000013782	R2QMC0_9ENTE	NO	LPQTG	YES	Enterococcus pallens ATCC BAA-351	LPXTG-domain-containing protein cell wall anchor domain	252	218-222
UP000013782	R2Q6W7_9ENTE	NO	LPQTG	YES	Enterococcus pallens ATCC BAA-351	LPXTG-domain-containing protein cell wall anchor domain	262	228-232
UP000013782	R2TB23_9ENTE	NO	LPQTG	YES	Enterococcus pallens ATCC BAA-351	Uncharacterized protein	120	79-83
UP000013782	R2QMA5_9ENTE	NO	LPQTG	YES	Enterococcus pallens ATCC BAA-351	LPXTG-domain-containing protein cell wall anchor domain	246	212-216
UP000013782	R2QMC0_9ENTE	NO	LPRTG	YES	Enterococcus pallens ATCC BAA-351	LPXTG-domain-containing protein cell wall anchor domain	252	200-204
UP000013782	R2QEA6_9ENTE	NO	LPRTG	YES	Enterococcus pallens ATCC BAA-351	LPXTG-domain-containing protein cell wall anchor domain	124	82-86
UP000013782	R2QLC5_9ENTE	NO	LPSTG	YES	Enterococcus pallens ATCC BAA-351	Fimbrial isopeptide formation D2 domain-containing protein	625	591-595
UP000013782	R2QQ46_9ENTE	NO	LPSTG	YES	Enterococcus pallens ATCC BAA-351	LPXTG-domain-containing protein cell wall anchor domain	256	208-212
UP000013782	R2QMA5_9ENTE	NO	LPSTG	YES	Enterococcus pallens ATCC BAA-351	LPXTG-domain-containing protein cell wall anchor domain	246	198-202
UP000013782	R2QER1_9ENTE	NO	LPTTG	YES	Enterococcus pallens ATCC BAA-351	Uncharacterized protein	113	73-77
UP000013782	R2QLQ2_9ENTE	NO	LPTTG	YES	Enterococcus pallens ATCC BAA-351	Uncharacterized protein	1156	1076-1080
UP000013782	R2T2N2_9ENTE	NO	LPVTG	YES	Enterococcus pallens ATCC BAA-351	Uncharacterized protein	118	80-84
UP000013785	R3WDL8_9ENTE	NO	LPATG	YES	Enterococcus phoeniculicola ATCC BAA-412	LPXTG-domain-containing protein cell wall anchor domain	366	331-335
UP000013785	R3U992_9ENTE	NO	LPATG	YES	Enterococcus phoeniculicola ATCC BAA-412	LPXTG-domain-containing protein cell wall anchor domain	129	84-88
UP000013785	R3TVB3_9ENTE	NO	LPFTG	YES	Enterococcus phoeniculicola ATCC BAA-412	Fimbrial isopeptide formation D2 domain-containing protein	570	535-539
UP000013785	R3TUH8_9ENTE	NO	LPKTG	YES	Enterococcus phoeniculicola ATCC BAA-412	LPXTG-domain-containing protein cell wall anchor domain	1188	1152-1156
UP000013785	R3WIU8_9ENTE	NO	LPKTG	YES	Enterococcus phoeniculicola ATCC BAA-412	LPXTG-domain-containing protein cell wall anchor domain	761	730-734
UP000013785	R3WI75_9ENTE	NO	LPKTG	YES	Enterococcus phoeniculicola ATCC BAA-412	Uncharacterized protein	1079	1037-1041
UP000013785	R3WDX0_9ENTE	NO	LPKTG	YES	Enterococcus phoeniculicola ATCC BAA-412	LPXTG-domain-containing protein cell wall anchor domain	112	73-77
UP000013785	R3WIX7_9ENTE	NO	LPKTG	YES	Enterococcus phoeniculicola ATCC BAA-412	LPXTG-domain-containing protein cell wall anchor domain	337	302-306
UP000013785	R3WUJ0_9ENTE	NO	LPKTG	YES	Enterococcus phoeniculicola ATCC BAA-412	Pilin isopeptide linkage domain-containing protein	212	172-176
UP000013785	R3TWM9_9ENTE	NO	LPKTG	YES	Enterococcus phoeniculicola ATCC BAA-412	Bacterial surface protein 26-residue	825	784-788
UP000013785	R3WFI5_9ENTE	NO	LPKTG	YES	Enterococcus phoeniculicola ATCC BAA-412	LPXTG-domain-containing protein cell wall anchor domain	114	78-82
UP000013785	R3TPU1_9ENTE	NO	LPKTG	YES	Enterococcus phoeniculicola ATCC BAA-412	LPXTG-domain-containing protein cell wall anchor domain	599	569-573
UP000013785	R3TX93_9ENTE	NO	LPQTG	YES	Enterococcus phoeniculicola ATCC BAA-412	LPXTG-domain-containing protein cell wall anchor domain	1074	1042-1046
UP000013785	R3W5U4_9ENTE	NO	LPQTG	YES	Enterococcus phoeniculicola ATCC BAA-412	LPXTG-domain-containing protein cell wall anchor domain	1071	1035-1039
UP000014104	S0L7E9_ENTAV	NO	LPETG	YES	Enterococcus avium ATCC 14025	GRAM_POS_ANCHORING domain-containing protein	1956	1892-1896
UP000014104	S0LBS6_ENTAV	NO	LPFTG	YES	Enterococcus avium ATCC 14025	Uncharacterized protein	577	542-546
UP000014104	S0S7R9_ENTAV	NO	LPKTG	YES	Enterococcus avium ATCC 14025	Gram_pos_anchor domain-containing protein	260	218-222
UP000014104	S0S7Z5_ENTAV	NO	LPKTG	YES	Enterococcus avium ATCC 14025	GRAM_POS_ANCHORING domain-containing protein	1510	1478-1482
UP000014104	S0LC73_ENTAV	NO	LPKTG	YES	Enterococcus avium ATCC 14025	GRAM_POS_ANCHORING domain-containing protein	336	303-307
UP000014104	S0KC47_ENTAV	NO	LPKTG	YES	Enterococcus avium ATCC 14025	Uncharacterized protein	551	518-522
UP000014104	S0RYX8_ENTAV	NO	LPKTG	YES	Enterococcus avium ATCC 14025	GRAM_POS_ANCHORING domain-containing protein	738	704-708
UP000014104	S0LDW6_ENTAV	NO	LPKTG	YES	Enterococcus avium ATCC 14025	Uncharacterized protein	313	276-280
UP000014104	S0RST2_ENTAV	NO	LPQTG	YES	Enterococcus avium ATCC 14025	GRAM_POS_ANCHORING domain-containing protein	942	909-913
UP000014104	S0RPK0_ENTAV	NO	LPRTG	YES	Enterococcus avium ATCC 14025	VWFA domain-containing protein	1094	1047-1051
UP000014104	S0L1Z8_ENTAV	NO	LPRTG	YES	Enterococcus avium ATCC 14025	GRAM_POS_ANCHORING domain-containing protein	1161	1127-1131
UP000014104	S0RP79_ENTAV	NO	LPSTG	YES	Enterococcus avium ATCC 14025	Uncharacterized protein	559	526-530
UP000014104	S0KMX1_ENTAV	NO	LPSTG	YES	Enterococcus avium ATCC 14025	Uncharacterized protein	529	496-500
UP000014104	S0L7E9_ENTAV	NO	LPSTG	YES	Enterococcus avium ATCC 14025	GRAM_POS_ANCHORING domain-containing protein	1956	1923-1927
UP000014104	S0S503_ENTAV	NO	LPSTG	YES	Enterococcus avium ATCC 14025	VWFA domain-containing protein	1276	1237-1241
UP000014104	S0LGS1_ENTAV	NO	LPSTG	YES	Enterococcus avium ATCC 14025	GRAM_POS_ANCHORING domain-containing protein	1491	1456-1460
UP000014113	S1NDH9_9ENTE	NO	LPKTG	YES	Enterococcus columbae DSM 7374 = ATCC 51263	Uncharacterized protein	3911	3875-3879
UP000014113	S0K691_9ENTE	NO	LPSTG	YES	Enterococcus columbae DSM 7374 = ATCC 51263	Uncharacterized protein	584	549-553
UP000014127	S1P0U6_9ENTE	NO	LPATG	YES	Enterococcus dispar ATCC 51266	Amino acid ABC transporter permease	533	447-451
UP000014127	S1NMQ5_9ENTE	NO	LPSTG	YES	Enterococcus dispar ATCC 51266	Uncharacterized protein	537	502-506
UP000014127	S0K4R3_9ENTE	NO	LPSTG	YES	Enterococcus dispar ATCC 51266	SpaA domain-containing protein	1344	1307-1311
UP000014127	S0KSJ1_9ENTE	NO	LPSTG	YES	Enterococcus dispar ATCC 51266	LPXTG-protein cell wall anchor protein	625	590-594
UP000014136	S0JHT0_9ENTE	NO	LPRTG	YES	Enterococcus saccharolyticus subsp. saccharolyticus ATCC 43076	GRAM_POS_ANCHORING domain-containing protein	672	639-643
UP000014594	S4D0M0_ENTFL	NO	LPETG	YES	Enterococcus faecalis 13-SD-W-01	LPXTG-motif protein cell wall anchor domain protein	1096	1064-1068
UP000014594	S4CYN4_ENTFL	NO	LPHTG	YES	Enterococcus faecalis 13-SD-W-01	LPXTG-motif protein cell wall anchor domain protein	644	610-614
UP000014594	S4DGC5_ENTFL	NO	LPKTG	YES	Enterococcus faecalis 13-SD-W-01	LPXTG-motif protein cell wall anchor domain protein	88	53-57
UP000014594	S4E209_ENTFL	NO	LPKTG	YES	Enterococcus faecalis 13-SD-W-01	LPXTG-motif protein cell wall anchor domain protein	671	635-639
UP000014594	S4D6V7_ENTFL	NO	LPKTG	YES	Enterococcus faecalis 13-SD-W-01	LPXTG-motif protein cell wall anchor domain protein	103	63-67
UP000014594	S4CTD2_ENTFL	NO	LPKTG	YES	Enterococcus faecalis 13-SD-W-01	LPXTG-motif protein cell wall anchor domain protein	100	69-73
UP000014594	S4E2E9_ENTFL	NO	LPKTG	YES	Enterococcus faecalis 13-SD-W-01	LPXTG-motif protein cell wall anchor domain protein	93	61-65
UP000014594	S4DE06_ENTFL	NO	LPQTG	YES	Enterococcus faecalis 13-SD-W-01	LPXTG-motif protein cell wall anchor domain protein	944	901-905
UP000015939	T0VD36_9ENTE	NO	LPATG	YES	Enterococcus sp. HSIEG1	Amino acid ABC transporter,glutamine-bindingprotein/permease protein	528	445-449
UP000015939	T0VD19_9ENTE	NO	LPKTG	YES	Enterococcus sp. HSIEG1	GRAM_POS_ANCHORING domain-containing protein	326	294-298
UP000015961	S0NPA4_9ENTE	NO	LPDTG	YES	Enterococcus sulfureus ATCC 49903	Uncharacterized protein	866	829-833
UP000015961	S0NP42_9ENTE	NO	LPGTG	YES	Enterococcus sulfureus ATCC 49903	Uncharacterized protein	597	561-565
UP000015961	S0L7V5_9ENTE	NO	LPSTG	YES	Enterococcus sulfureus ATCC 49903	Uncharacterized protein	116	80-84
UP000018580	V5XM49_ENTMU	NO	LPATG	YES	Enterococcus mundtii QU 25	Amino acid ABC transporter amino acid-binding/permease protein	531	444-448
UP000018580	V5XMZ7_ENTMU	NO	LPATG	YES	Enterococcus mundtii QU 25	Pilus subunit protein EbpCfm	622	589-593
UP000018580	V5XP31_ENTMU	NO	LPETG	YES	Enterococcus mundtii QU 25	Uncharacterized protein	123	83-87
UP000018580	V5XPL2_ENTMU	NO	LPKTG	YES	Enterococcus mundtii QU 25	LPXTG family cell surface protein Fms22	462	432-436
UP000018580	V5XUY2_ENTMU	NO	LPQTG	YES	Enterococcus mundtii QU 25	ATP-binding cassette transporter-like protein	417	400-404
UP000018580	V5XSV7_ENTMU	NO	LPQTG	YES	Enterococcus mundtii QU 25	Gram_pos_anchor domain-containing protein	108	71-75
UP000018580	V5XQM7_ENTMU	NO	LPQTG	YES	Enterococcus mundtii QU 25	Uncharacterized protein	101	68-72
UP000078516	A0A179ESC0_ENTTH	NO	LPATG	YES	nterococcus thailandicus	Amino acid ABC transporter permease	530	443-447
UP000078516	A0A179ET51_ENTTH	NO	LPETG	YES	nterococcus thailandicus	VWFA domain-containing protein	1196	1163-1167
UP000078516	A0A179ERY0_ENTTH	NO	LPKTG	YES	nterococcus thailandicus	GRAM_POS_ANCHORING domain-containing protein	92	56-60
UP000078516	A0A179EVA7_ENTTH	NO	LPKTG	YES	nterococcus thailandicus	GRAM_POS_ANCHORING domain-containing protein	130	96-100
UP000078516	A0A179ET34_ENTTH	NO	LPSTG	YES	nterococcus thailandicus	Cell surface protein	627	593-597
UP000078516	A0A179ERZ5_ENTTH	NO	LPSTG	YES	nterococcus thailandicus	Peptidase	552	517-521
UP000078516	A0A179ERI6_ENTTH	NO	LPSTG	YES	nterococcus thailandicus	Gram_pos_anchor domain-containing protein	115	78-82
UP000094764	A0A1E5GSF0_9ENTE	NO	LPATG	YES	Enterococcus quebecensis	Amino acid ABC transporter permease	530	444-448
UP000094764	A0A1E5GPJ6_9ENTE	NO	LPKTG	YES	Enterococcus quebecensis	Uncharacterized protein	252	209-213
UP000094764	A0A1E5H2U6_9ENTE	NO	LPKTG	YES	Enterococcus quebecensis	Bifunctional metallophosphatase/5'-nucleotidase	763	732-736
UP000094764	A0A1E5GR57_9ENTE	NO	LPKTG	YES	Enterococcus quebecensis	Uncharacterized protein	94	56-60
UP000094764	A0A1E5GV52_9ENTE	NO	LPNTG	YES	Enterococcus quebecensis	Gram_pos_anchor domain-containing protein	124	73-77
UP000094764	A0A1E5GS99_9ENTE	NO	LPNTG	YES	Enterococcus quebecensis	Uncharacterized protein	594	556-560
UP000094764	A0A1E5H3R3_9ENTE	NO	LPNTG	YES	Enterococcus quebecensis	Uncharacterized protein	804	770-774
UP000094764	A0A1E5GRI8_9ENTE	NO	LPPTG	YES	Enterococcus quebecensis	GRAM_POS_ANCHORING domain-containing protein	364	331-335
UP000094764	A0A1E5H1N6_9ENTE	NO	LPQTG	YES	Enterococcus quebecensis	GRAM_POS_ANCHORING domain-containing protein	529	495-499
UP000094764	A0A1E5GRM9_9ENTE	NO	LPQTG	YES	Enterococcus quebecensis	GRAM_POS_ANCHORING domain-containing protein	491	458-462
UP000094764	A0A1E5GQ39_9ENTE	NO	LPVTG	YES	Enterococcus quebecensis	GRAM_POS_ANCHORING domain-containing protein	364	331-335
UP000095256	A0A1E5KV18_9ENTE	NO	LPATG	YES	Enterococcus rivorum	Uncharacterized protein	406	370-374
UP000095256	A0A1E5KT43_9ENTE	NO	LPATG	YES	Enterococcus rivorum	GRAM_POS_ANCHORING domain-containing protein	437	400-404
UP000095256	A0A1E5KX67_9ENTE	NO	LPATG	YES	Enterococcus rivorum	GRAM_POS_ANCHORING domain-containing protein	101	65-69
UP000095256	A0A1E5KU47_9ENTE	NO	LPKTG	YES	Enterococcus rivorum	Cell wall protein	1608	1573-1577
UP000095256	A0A1E5KUU4_9ENTE	NO	LPKTG	YES	Enterococcus rivorum	Gram_pos_anchor domain-containing protein	265	230-234
UP000095256	A0A1E5L1H4_9ENTE	NO	LPKTG	YES	Enterococcus rivorum	Bacterial surface protein 26-residue	712	677-681
UP000095256	A0A1E5KZL3_9ENTE	NO	LPKTG	YES	Enterococcus rivorum	Bifunctional metallophosphatase/5'-nucleotidase	765	731-735
UP000095256	A0A1E5KWW5_9ENTE	NO	LPKTG	YES	Enterococcus rivorum	Uncharacterized protein	106	72-76
UP000095256	A0A1E5KV21_9ENTE	NO	LPKTG	YES	Enterococcus rivorum	GRAM_POS_ANCHORING domain-containing protein	311	275-279
UP000095256	A0A1E5KXB8_9ENTE	NO	LPMTG	YES	Enterococcus rivorum	Gram_pos_anchor domain-containing protein	99	62-66
UP000095256	A0A1E5KU47_9ENTE	NO	LPNTG	YES	Enterococcus rivorum	Cell wall protein	1608	1566-1570
UP000095256	A0A1E5KVW9_9ENTE	NO	LPNTG	YES	Enterococcus rivorum	GRAM_POS_ANCHORING domain-containing protein	654	622-626
UP000095256	A0A1E5KYA6_9ENTE	NO	LPQTG	YES	Enterococcus rivorum	Uncharacterized protein	251	206-210
UP000095256	A0A1E5KUV9_9ENTE	NO	LPRTG	YES	Enterococcus rivorum	GRAM_POS_ANCHORING domain-containing protein	918	885-889
UP000095256	A0A1E5L000_9ENTE	NO	LPRTG	YES	Enterococcus rivorum	Proteinase b	1735	1701-1705
UP000095256	A0A1E5KWZ8_9ENTE	NO	LPSTG	YES	Enterococcus rivorum	Uncharacterized protein	116	77-81
UP000095256	A0A1E5KSS6_9ENTE	NO	LPSTG	YES	Enterococcus rivorum	Uncharacterized protein	116	75-79
UP000095256	A0A1E5KZC5_9ENTE	NO	LPSTG	YES	Enterococcus rivorum	GRAM_POS_ANCHORING domain-containing protein	612	576-580
UP000095256	A0A1E5L0M7_9ENTE	NO	LPSTG	YES	Enterococcus rivorum	GramPos_pilinD1 domain-containing protein	252	212-216
UP000095256	A0A1E5KSD1_9ENTE	NO	LPSTG	YES	Enterococcus rivorum	Gram_pos_anchor domain-containing protein	114	75-79
UP000095256	A0A1E5KWN7_9ENTE	NO	LPVTG	YES	Enterococcus rivorum	Uncharacterized protein	129	95-99
UP000181884	A0A1L8RC33_9ENTE	NO	LPATG	YES	Enterococcus canis	Amino acid ABC transporter permease	539	447-451
UP000181884	A0A1L8RFF3_9ENTE	NO	LPATG	YES	Enterococcus canis	GRAM_POS_ANCHORING domain-containing protein	345	314-318
UP000181884	A0A1L8RHT4_9ENTE	NO	LPHTG	YES	Enterococcus canis	GRAM_POS_ANCHORING domain-containing protein	1722	1687-1691
UP000181884	A0A1L8RC71_9ENTE	NO	LPKTG	YES	Enterococcus canis	WW domain-containing protein	1904	1866-1870
UP000181884	A0A1L8RCN8_9ENTE	NO	LPNTG	YES	Enterococcus canis	Peptidase	432	402-406
UP000182077	A0A1L8TQB0_9ENTE	NO	LPKTG	YES	Enterococcus hermanniensis	GRAM_POS_ANCHORING domain-containing protein	367	334-338
UP000182077	A0A1L8TI61_9ENTE	NO	LPQTG	YES	Enterococcus hermanniensis	GRAM_POS_ANCHORING domain-containing protein	713	680-684
UP000182077	A0A1L8TMD3_9ENTE	NO	LPSTG	YES	Enterococcus hermanniensis	LPXTG-domain-containing protein cell wall anchor domain	526	492-496
UP000182077	A0A1L8TS81_9ENTE	NO	LPTTG	YES	Enterococcus hermanniensis	Uncharacterized protein	1458	1422-1426
UP000182149	A0A1L8QXQ5_9ENTE	NO	LPATG	YES	Enterococcus aquimarinus	Peptidase	490	455-459
UP000182149	A0A1L8QMS7_9ENTE	NO	LPKTG	YES	Enterococcus aquimarinus	Beta-xylanase	804	774-778
UP000182149	A0A1L8QXQ4_9ENTE	NO	LPQTG	YES	Enterococcus aquimarinus	GramPos_pilinD1 domain-containing protein	274	213-217
UP000182149	A0A1L8QXQ4_9ENTE	NO	LPQTG	YES	Enterococcus aquimarinus	GramPos_pilinD1 domain-containing protein	274	235-239
UP000182152	A0A1L8WBN9_9ENTE	NO	LPATG	YES	Enterococcus ratti	His/Glu/Gln/Arg/opine family amino ABC transporter, permease, 3-TM region	531	444-448
UP000182152	A0A1L8WPC3_9ENTE	NO	LPKTG	YES	Enterococcus ratti	LPXTG-domain-containing protein cell wall anchor domain	1016	973-977
UP000182152	A0A1L8WLH1_9ENTE	NO	LPQTG	YES	Enterococcus ratti	Gram_pos_anchor domain-containing protein	116	77-81
UP000194766	A0A242L604_9ENTE	NO	LPETG	YES	Enterococcus sp. 6C8_DIV0013	GRAM_POS_ANCHORING domain-containing protein	427	390-394
UP000194766	A0A2C9XTK7_9ENTE	NO	LPKTG	YES	Enterococcus sp. 6C8_DIV0013	GRAM_POS_ANCHORING domain-containing protein	746	713-717
UP000194766	A0A242L6A4_9ENTE	NO	LPKTG	YES	Enterococcus sp. 6C8_DIV0013	Uncharacterized protein	107	69-73
UP000194766	A0A242L332_9ENTE	NO	LPKTG	YES	Enterococcus sp. 6C8_DIV0013	GRAM_POS_ANCHORING domain-containing protein	802	767-771
UP000194766	A0A242L565_9ENTE	NO	LPKTG	YES	Enterococcus sp. 6C8_DIV0013	GRAM_POS_ANCHORING domain-containing protein	759	723-727
UP000194766	A0A2C9XRH9_9ENTE	NO	LPKTG	YES	Enterococcus sp. 6C8_DIV0013	Uncharacterized protein	791	752-756
UP000194766	A0A2C9XUK5_9ENTE	NO	LPKTG	YES	Enterococcus sp. 6C8_DIV0013	GRAM_POS_ANCHORING domain-containing protein	366	334-338
UP000194766	A0A242L578_9ENTE	NO	LPKTG	YES	Enterococcus sp. 6C8_DIV0013	Uncharacterized protein	2626	2588-2592
UP000194766	A0A242L5Q2_9ENTE	NO	LPKTG	YES	Enterococcus sp. 6C8_DIV0013	Uncharacterized protein	1196	1160-1164
UP000194766	A0A2C9XU52_9ENTE	NO	LPKTG	YES	Enterococcus sp. 6C8_DIV0013	Pullulanase, type I	1030	1001-1004
UP000194766	A0A2C9XSJ6_9ENTE	NO	LPKTG	YES	Enterococcus sp. 6C8_DIV0013	Gram_pos_anchor domain-containing protein	102	66-70
UP000194766	A0A242L8V8_9ENTE	NO	LPKTG	YES	Enterococcus sp. 6C8_DIV0013	GRAM_POS_ANCHORING domain-containing protein	1512	1482-1486
UP000194766	A0A242L7U8_9ENTE	NO	LPNTG	YES	Enterococcus sp. 6C8_DIV0013	GRAM_POS_ANCHORING domain-containing protein	729	697-701
UP000194766	A0A2C9XTW8_9ENTE	NO	LPQTG	YES	Enterococcus sp. 6C8_DIV0013	GRAM_POS_ANCHORING domain-containing protein	344	311-315
UP000194766	A0A242L2Z3_9ENTE	NO	LPQTG	YES	Enterococcus sp. 6C8_DIV0013	SpaA domain-containing protein	367	335-339
UP000194766	A0A242L809_9ENTE	NO	LPQTG	YES	Enterococcus sp. 6C8_DIV0013	GramPos_pilinD1 domain-containing protein	260	225-229
UP000194766	A0A242L9F7_9ENTE	NO	LPSTG	YES	Enterococcus sp. 6C8_DIV0013	Uncharacterized protein	549	514-518
UP000194766	A0A242L2Z2_9ENTE	NO	LPSTG	YES	Enterococcus sp. 6C8_DIV0013	Uncharacterized protein	498	463-467
UP000194933	A0A242K0V5_9ENTE	NO	LPATG	YES	Enterococcus sp. 10A9_DIV0425	Uncharacterized protein	619	586-590
UP000194933	A0A242K1M0_9ENTE	NO	LPATG	YES	Enterococcus sp. 10A9_DIV0425	Amino acid ABC transporter permease	531	444-448
UP000194933	A0A242K2L7_9ENTE	NO	LPETG	YES	Enterococcus sp. 10A9_DIV0425	VWFA domain-containing protein	1178	1142-1146
UP000194933	A0A242JYG5_9ENTE	NO	LPKTG	YES	Enterococcus sp. 10A9_DIV0425	GRAM_POS_ANCHORING domain-containing protein	1034	1000-1004
UP000194933	A0A2C9XSA3_9ENTE	NO	LPKTG	YES	Enterococcus sp. 10A9_DIV0425	Uncharacterized protein	988	955-959
UP000194933	A0A242JZ24_9ENTE	NO	LPKTG	YES	Enterococcus sp. 10A9_DIV0425	Gram_pos_anchor domain-containing protein	133	94-98
UP000194933	A0A242K057_9ENTE	NO	LPKTG	YES	Enterococcus sp. 10A9_DIV0425	Gram_pos_anchor domain-containing protein	409	378-382
UP000194933	A0A2C9XQ76_9ENTE	NO	LPKTG	YES	Enterococcus sp. 10A9_DIV0425	Gram_pos_anchor domain-containing protein	435	401-405
UP000194933	A0A242JZE5_9ENTE	NO	LPKTG	YES	Enterococcus sp. 10A9_DIV0425	Gram_pos_anchor domain-containing protein	110	69-93
UP000195141	A0A242K8K9_9ENTE	NO	LPETG	YES	Enterococcus sp. 9E7_DIV0242	Uncharacterized protein	420	384-388
UP000195141	A0A242K7U8_9ENTE	NO	LPKTG	YES	Enterococcus sp. 9E7_DIV0242	Uncharacterized protein	102	67-71
UP000195141	A0A242K6T3_9ENTE	NO	LPNTG	YES	Enterococcus sp. 9E7_DIV0242	Uncharacterized protein	252	213-217
UP000195141	A0A242K2R6_9ENTE	NO	LPQTG	YES	Enterococcus sp. 9E7_DIV0242	GRAM_POS_ANCHORING domain-containing protein	620	588-592
UP000195141	A0A242K790_9ENTE	NO	LPSTG	YES	Enterococcus sp. 9E7_DIV0242	Gram_pos_anchor domain-containing protein	127	87-91
UP000254070	A0A377KIH1_9ENTE	NO	LPATG	YES	Enterococcus durans	Amino acid ABC transporter amino acid-binding/permease protein	531	444-448
UP000254070	A0A377KM80_9ENTE	NO	LPETG	YES	Enterococcus durans	von Willebrand factor type A domain-containing protein	1138	1101-1105
UP000254070	A0A377KJ64_9ENTE	NO	LPHTG	YES	Enterococcus durans	LPXTG-motif protein cell wall anchor domain protein	669	635-639
UP000254070	A0A377JX67_9ENTE	NO	LPKTG	YES	Enterococcus durans	Gram positive anchor	246	216-220
UP000254070	A0A377KPY4_9ENTE	NO	LPKTG	YES	Enterococcus durans	Cell wall anchor domain-containing protein	936	903-907
UP000254070	A0A377KMP3_9ENTE	NO	LPMTG	YES	Enterococcus durans	Chitin-binding protein	564	531-535
UP000254070	A0A2A7SSN0_9ENTE	NO	LPQTG	YES	Enterococcus durans	LPXTG cell wall anchor domain-containing protein	112	66-70
UP000254070	A0A377KIV5_9ENTE	NO	LPQTG	YES	Enterococcus durans	Cell wall surface adhesion protein	1000	968-972
UP000254070	A0A377KJH9_9ENTE	NO	LPSTG	YES	Enterococcus durans	LPXTG-motif protein cell wall anchor domain protein	564	531-535
UP000254070	A0A377KPB3_9ENTE	NO	LPSTG	YES	Enterococcus durans	LPXTG-motif protein cell wall anchor domain protein	617	585-589
UP000254070	A0A377KLR9_9ENTE	NO	LPTTG	YES	Enterococcus durans	LPXTG-motif cell wall anchor domain-containing protein	11076	1043-1047
UP000290567	A0A4P5PC85_9ENTE	NO	LPATG	YES	Enterococcus florum	Uncharacterized protein	556	523-527
UP000290567	A0A4P5P8G3_9ENTE	NO	LPATG	YES	Enterococcus florum	Glutamine ABC transporter substrate-binding protein	531	443-447
UP000290567	A0A4P5PB68_9ENTE	NO	LPATG	YES	Enterococcus florum	SpaA domain-containing protein	564	531-535
UP000290567	A0A4P5PBG1_9ENTE	NO	LPETG	YES	Enterococcus florum	Uncharacterized protein	1013	976-980
UP000290567	A0A4P5P9K9_9ENTE	NO	LPFTG	YES	Enterococcus florum	Uncharacterized protein	953	914-920
UP000290567	A0A4P5PBE9_9ENTE	NO	LPGTG	YES	Enterococcus florum	Peptidase	577	542-546
UP000290567	A0A4P5PC71_9ENTE	NO	LPKTG	YES	Enterococcus florum	Peptidase	427	393-397
UP000290567	A0A4P5PEJ2_9ENTE	NO	LPKTG	YES	Enterococcus florum	GRAM_POS_ANCHORING domain-containing protein	344	308-312
UP000290567	A0A4V0WPE7_9ENTE	NO	LPLTG	YES	Enterococcus florum	GRAM_POS_ANCHORING domain-containing protein	646	614-618
UP000290567	A0A4P5P8P0_9ENTE	NO	LPNTG	YES	Enterococcus florum	Pilus protein	922	883-887
UP000290567	A0A4P5PEX8_9ENTE	NO	LPNTG	YES	Enterococcus florum	GRAM_POS_ANCHORING domain-containing protein	457	422-426
UP000290567	A0A4V0WPX2_9ENTE	NO	LPQTG	YES	Enterococcus florum	Uncharacterized protein	527	492-496
UP000290567	A0A4P5PKD7_9ENTE	NO	LPQTG	YES	Enterococcus florum	Uncharacterized protein	527	484-488
UP000290567	A0A4P5PFX7_9ENTE	NO	LPQTG	YES	Enterococcus florum	Gram_pos_anchor domain-containing protein	251	211-215
UP000290567	A0A4P5PHY6_9ENTE	NO	LPRTG	YES	Enterococcus florum	Peptidase	419	385-389
UP000290567	A0A4P5PKK7_9ENTE	NO	LPRTG	YES	Enterococcus florum	Uncharacterized protein	238	205-209
UP000290567	A0A4P5PBQ5_9ENTE	NO	LPRTG	YES	Enterococcus florum	Uncharacterized protein	530	497-501
UP000290567	A0A4P5P9B3_9ENTE	NO	LPSTG	YES	Enterococcus florum	Pilus protein	558	524-528
UP000290567	A0A4V0WPR4_9ENTE	NO	LPSTG	YES	Enterococcus florum	Uncharacterized protein	1113	1073-1077
UP000290567	A0A4P5P8L7_9ENTE	NO	LPSTG	YES	Enterococcus florum	Pilus protein	549	515-519
UP000290567	A0A4P5PDY0_9ENTE	NO	LPSTG	YES	Enterococcus florum	Cell wall surface anchor protein	624	590-594
UP000290567	A0A4P5P4X9_9ENTE	NO	LPSTG	YES	Enterococcus florum	Pilus protein	546	512-516
UP000290567	A0A4P5PNJ8_9ENTE	NO	LPSTG	YES	Enterococcus florum	Cell wall surface anchor protein	615	582-586
UP000290567	A0A4P5PDT0_9ENTE	NO	LPSTG	YES	Enterococcus florum	VWFA domain-containing protein	1036	997-1001
UP000290567	A0A4P5PEL6_9ENTE	NO	LPSTG	YES	Enterococcus florum	Uncharacterized protein	516	483-487
UP000290567	A0A4P5PAP1_9ENTE	NO	LPSTG	YES	Enterococcus florum	Pilus protein	551	517-521
